# Supplementary material for: Size-dependent reactivity of Rh cationic clusters to reduce NO by CO in the gas phase at high temperatures
Source: Royal Society of Chemistry journal article supplement (doi:10.1039/d3cp05862j), 2024-01-01
Supplement: d3cp05862j1.pdf [file d3cp05862j1.pdf]

**Electronic supplementary information**

**Size-dependent reactivity of Rh cationic clusters  
to reduce NO by CO in gas phase at high temperatures**

Ken Miyajima<sup>a</sup>, Toshiaki Nagata<sup>a</sup> and Fumitaka Mafuné<sup>a\*</sup>  
Tomoya Ichino<sup>c</sup> and Satoshi Maeda<sup>b,c</sup>  
Taizo Yoshinaga<sup>d</sup>, Masahide Miura<sup>d</sup> and Takahiro Hayashi<sup>d</sup>

<sup>a</sup>*Department of Basic Science, Graduate School of Arts and Sciences, The University of Tokyo,  
Komaba, Meguro-ku, Tokyo 153-8902, Japan*

<sup>b</sup>*Department of Chemistry, Faculty of Science, Hokkaido University,  
N10-W8, Kita-ku, Sapporo, Hokkaido 060-0810, Japan*

<sup>c</sup>*Institute for Chemical Reaction Design and Discovery (WPI-ICReDD), Hokkaido University,  
N21-W10, Kita-ku, Sapporo, Hokkaido 001-0021, Japan*

<sup>d</sup>*Advanced Material Engineering Division, Toyota Motor Corporation,  
1200, Mishuku, Susono, Shizuoka 410-1193, Japan*

**List of Contents**

| Page |         | Description                                                                                                                                                                                     |
|------|---------|-------------------------------------------------------------------------------------------------------------------------------------------------------------------------------------------------|
| S2   | Fig. S1 | Mass spectra of $\text{Rh}_{2-10}\text{N}_x\text{O}_y^+$ cluster ions measured using an extension tube in an unheated state with and without CO gas injection.                                  |
| S4   | Fig. S2 | Mass spectra of $\text{Rh}_{2-10}\text{N}_x\text{O}_y^+$ cluster ions after heating in an extension tube at 663 K with and without CO gas injection.                                            |
| S6   | Fig. S3 | Mass spectra of $\text{Rh}_{2-12}\text{N}_x\text{O}_y^+$ cluster ions after heating in an extension tube at 903 K with and without CO gas injection.                                            |
| S8   | Fig. S4 | Signal intensity of $\text{Rh}_{2-7}\text{N}_x\text{O}_y^+$ cluster ions after heating in an extension tube at 903 K.                                                                           |
| S9   | Fig. S5 | TDS plots for $n = 3$ with alternate on-off gas injection of CO.                                                                                                                                |
| S10  | Fig. S6 | TDS plots for $n = 2-5$ with alternate on-off gas injection of CO.                                                                                                                              |
| S12  | Fig. S7 | Overall zero-point corrected energy profiles for the reduction of $\text{Rh}_3\text{N}_2\text{O}_2^+$ by CO calculated at the TPSSh-D3/def2-TZVP//def2-SV(P) level using the RI technique.      |
| S14  | Fig. S8 | Overall zero-point corrected energy profiles for the reduction of $\text{Rh}_6\text{N}_2\text{O}_2^+$ by CO were calculated at the TPSSh-D3/def2-TZVP//def2-SV(P) level using the RI technique. |
| S16  | Fig. S9 | Octahedral $\text{Rh}_6$ structures at transition states for NO dissociation and CO oxidation and relative stability with zero-point corrected energy.                                          |
| S17  |         | Optimized structures and energies determined at the RI-TPSSh-D3/def2-SV(P) level.                                                                                                               |

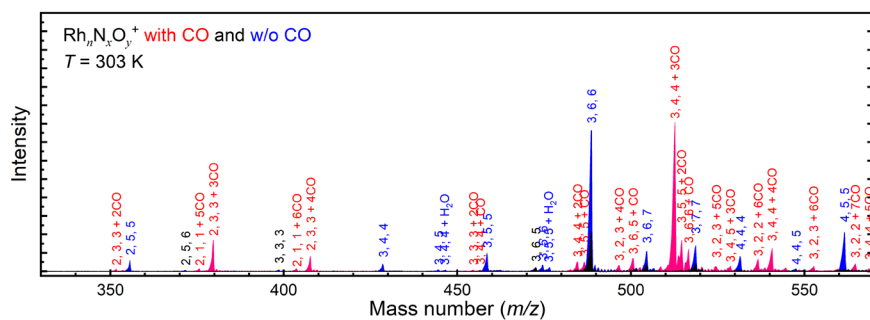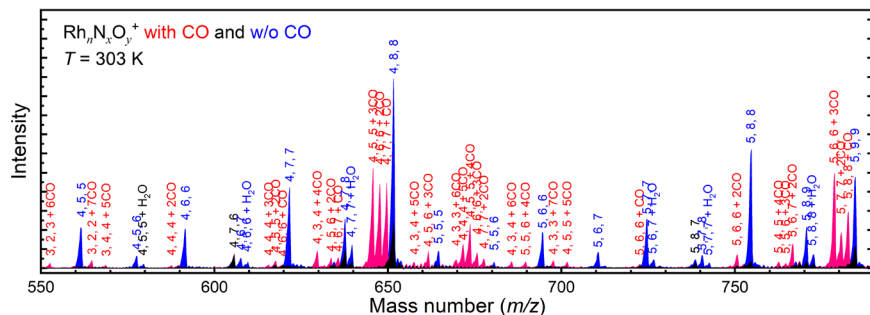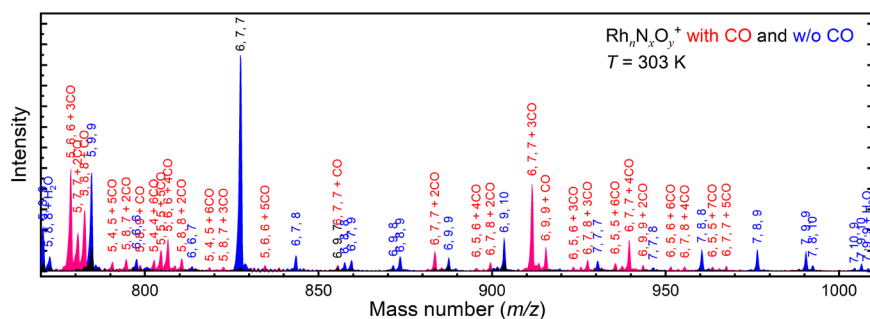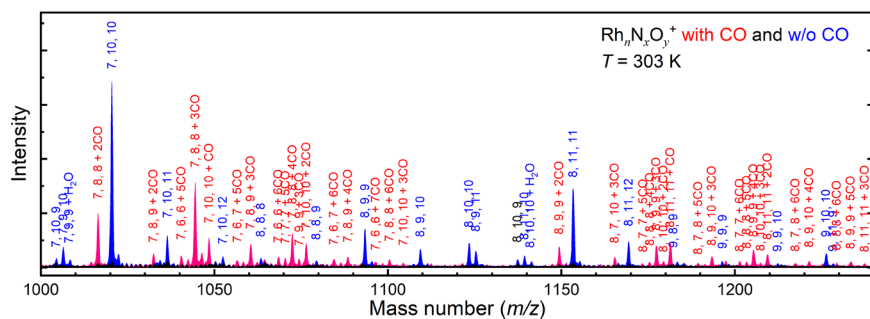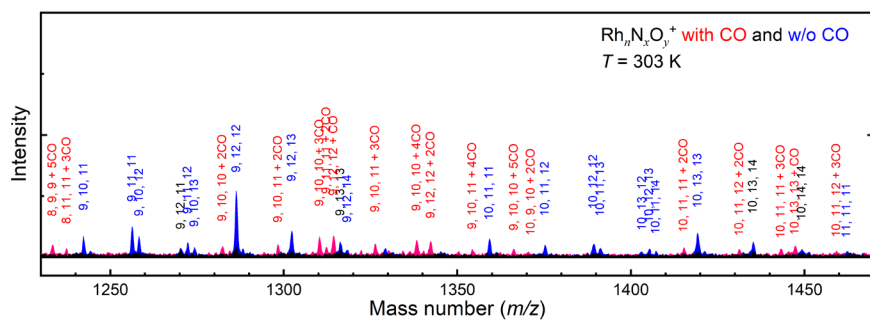

**Fig. S1** Mass spectra of  $\text{Rh}_{2-10}\text{N}_x\text{O}_y^+$  cluster ions measured using an extension tube in an unheated state with and without CO gas injection. The entire mass spectrum was divided into four sections to clearly display peak assignments. The color of the peak fills in the mass spectrum corresponds to blue for no reaction with CO, red for reaction with CO, and black for the common areas. Each mass peak is attributed to the composition  $\text{Rh}_n\text{N}_x\text{O}_y^+$  of the cluster in the simplified form  $n, x, y$ . The CO adduct is denoted as  $\text{Rh}_n\text{N}_x\text{O}_y(\text{CO})_k^+$  in the form  $n, x, y + k\text{CO}$ . The colors on the label indicate blue for a decrease in the response to CO, red for an increase, and black for a small change.

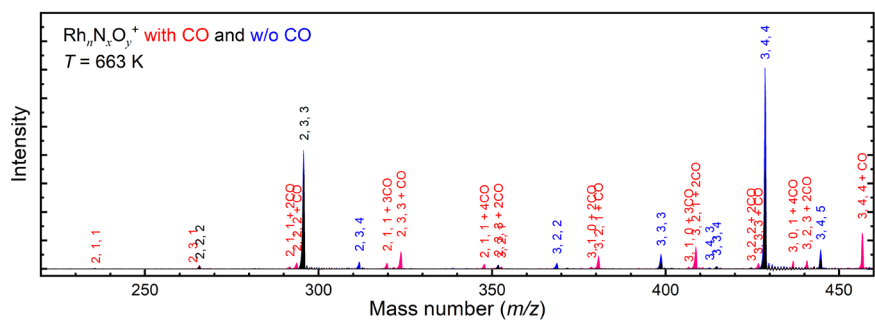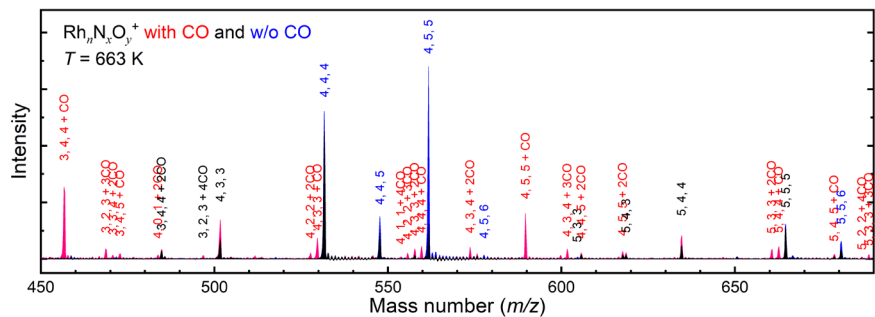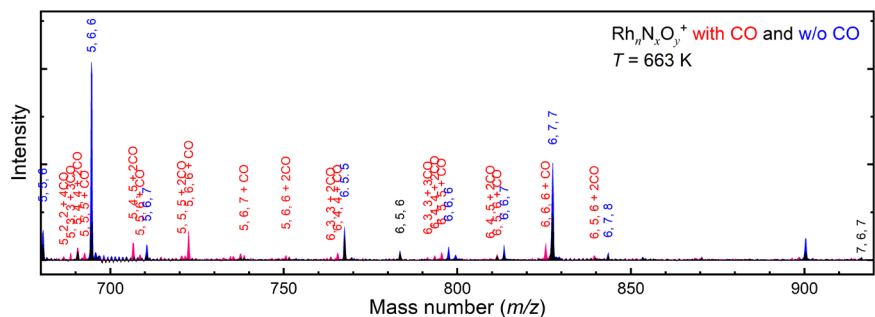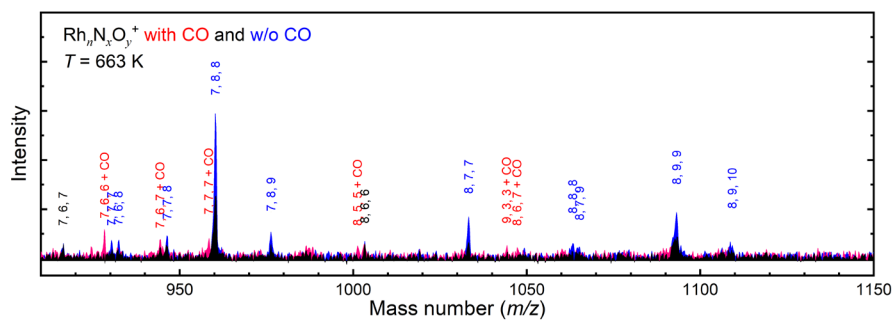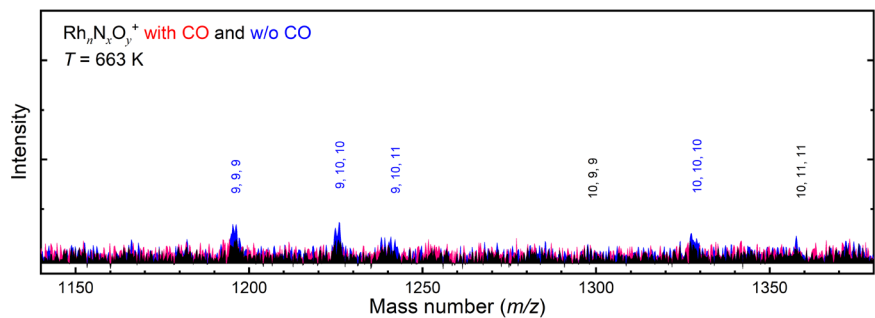

**Fig. S2** Mass spectra of  $\text{Rh}_{2-10}\text{N}_x\text{O}_y^+$  cluster ions after heating in an extension tube at 663 K with and without CO gas injection. The entire mass spectrum was divided into four sections to clearly display peak assignments. The color of the peak fills in the mass spectrum corresponds to blue for no reaction with CO, red for reaction with CO, and black for the common areas. Each mass peak is attributed to the composition  $\text{Rh}_n\text{N}_x\text{O}_y^+$  of the cluster in the simplified form  $n, x, y$ . The colors on the label indicate blue for a decrease in the response to CO, red for an increase, and black for a small change.

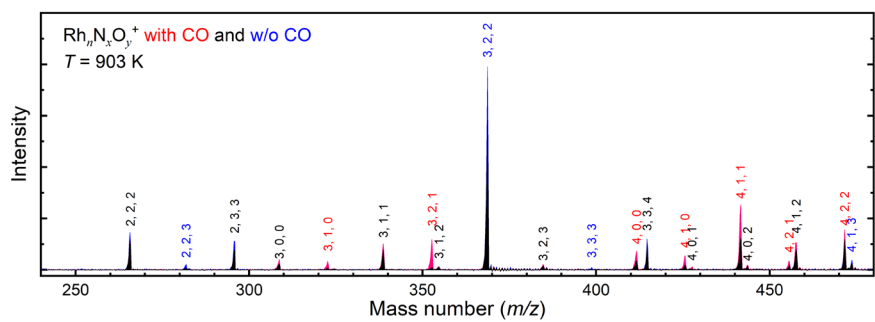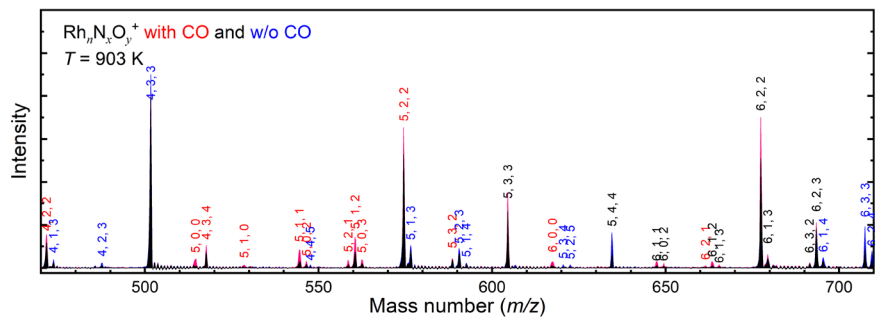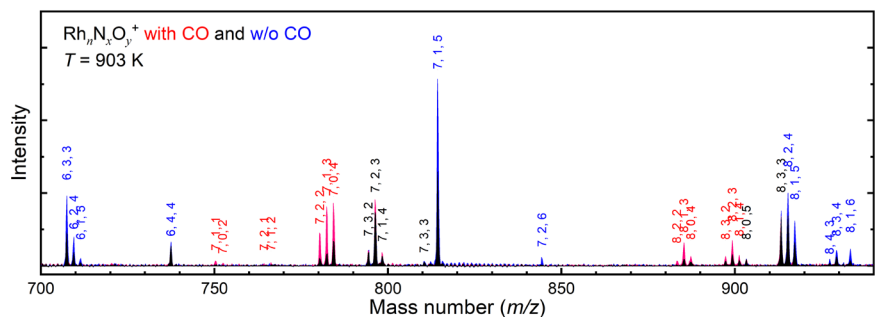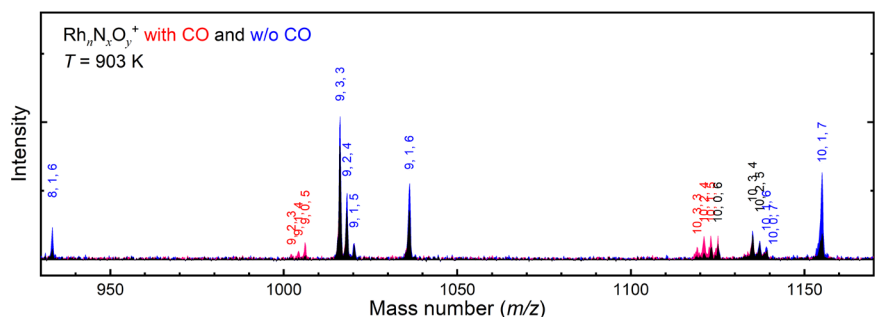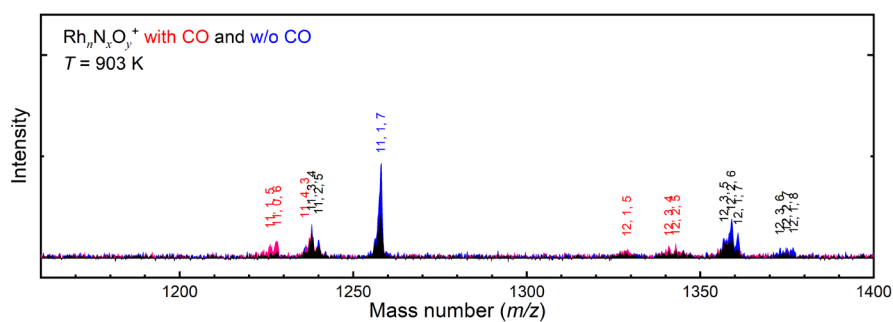

**Fig. S3** Mass spectra of  $\text{Rh}_{2-12}\text{N}_x\text{O}_y^+$  cluster ions after heating in an extension tube at 903 K with and without CO gas injection. The entire mass spectrum was divided into four sections to clearly display peak assignments. The color of the peak fills in the mass spectrum corresponds to blue for no reaction with CO, red for reaction with CO, and black for the common areas. Each mass peak is attributed to the composition  $\text{Rh}_n\text{N}_x\text{O}_y^+$  of the cluster in the simplified form  $n, x, y$ . The colors on the label indicate blue for a decrease in the response to CO, red for an increase, and black for a small change.

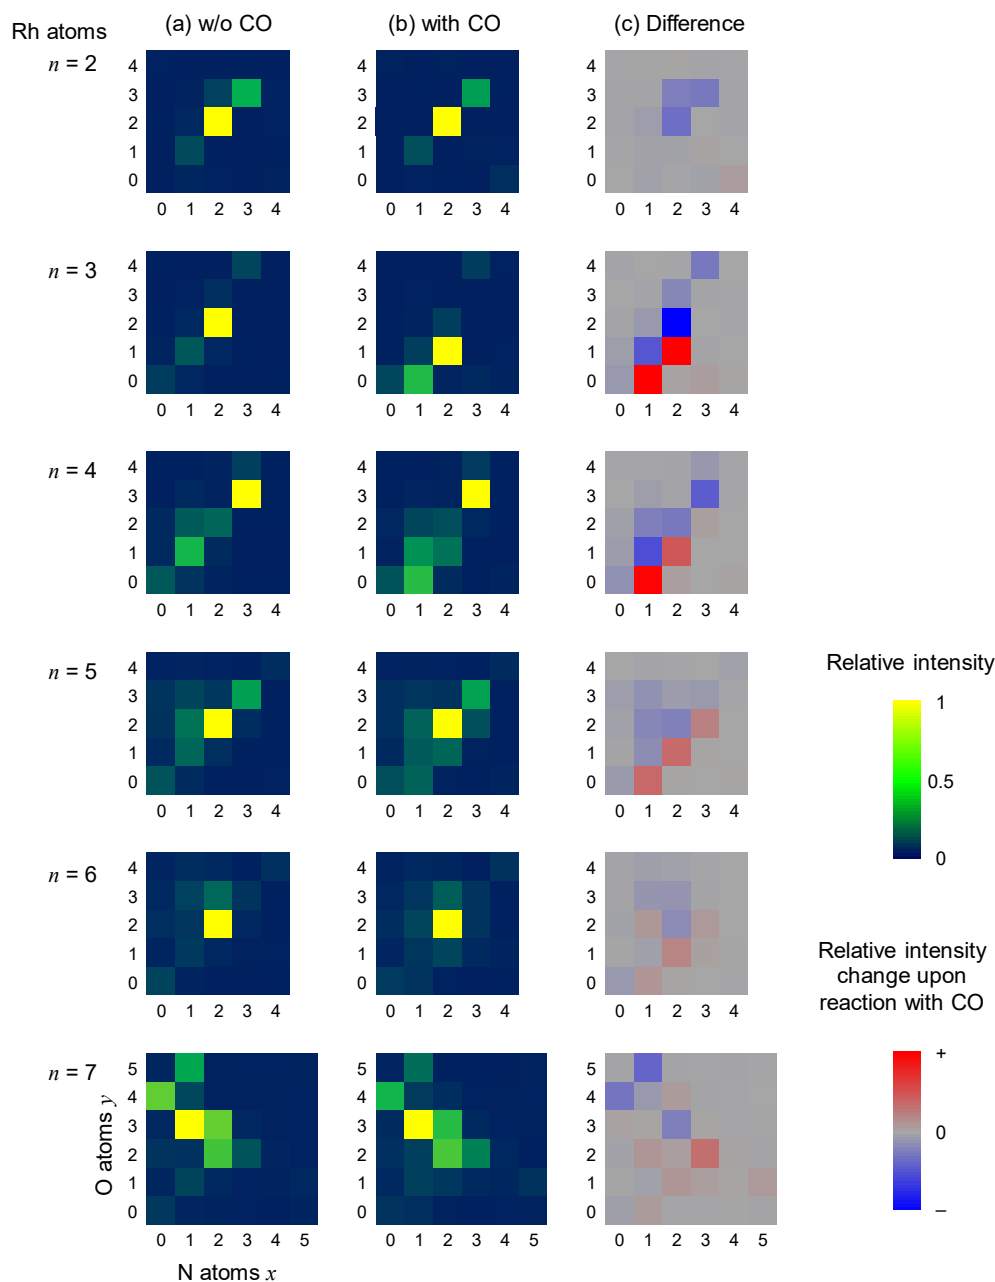

**Fig. S4** Signal intensity of  $\text{Rh}_{2-7}\text{N}_x\text{O}_y^+$  cluster ions after heating in an extension tube at 903 K. (a) without CO gas reactant, (b) with CO gas reactant, and (c) the difference between them. To minimize the fluctuation, the average value of four measurements was used. Blue and red colors indicate a decrease and increase in response to CO gas injection, respectively, and gray indicates no changes.



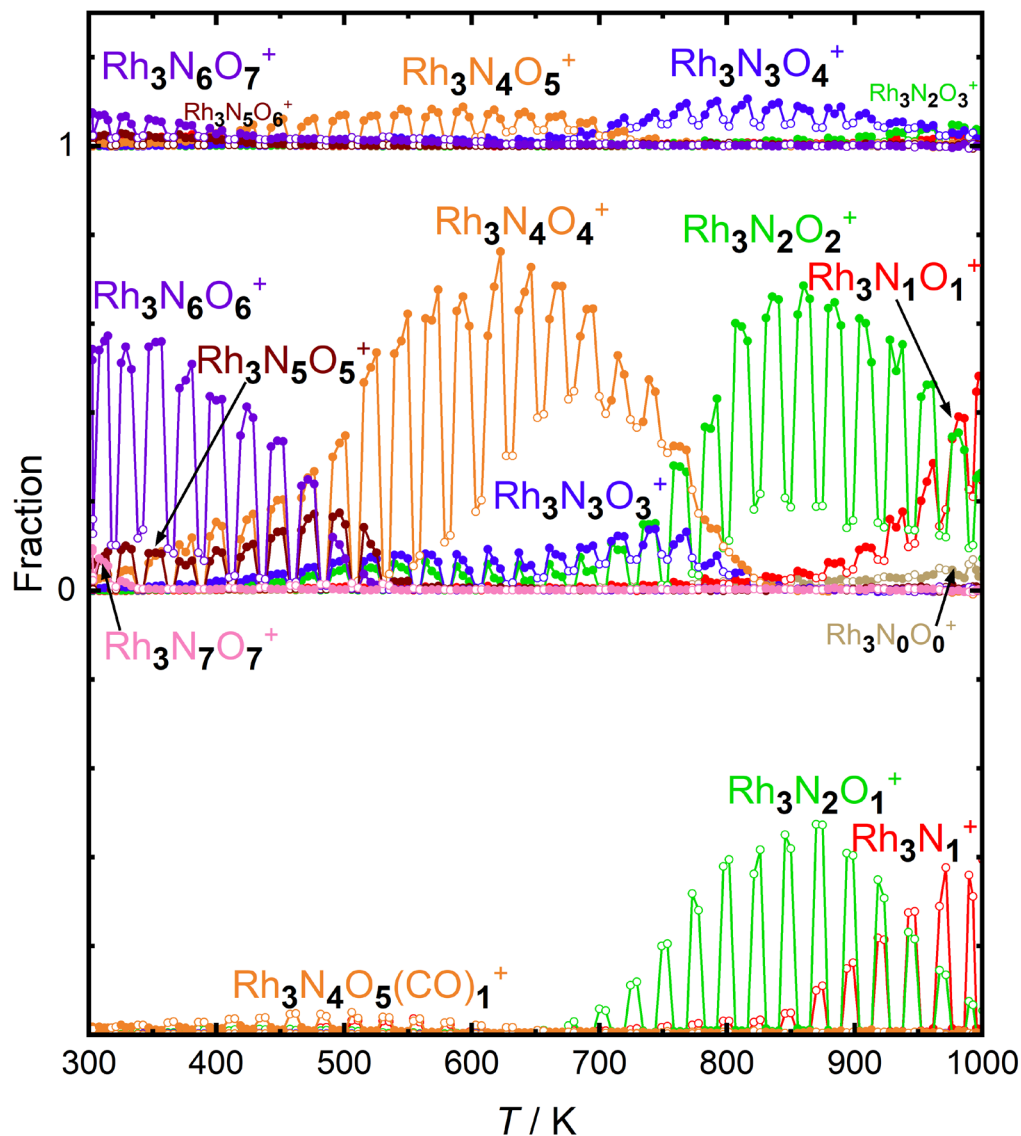

**Fig. S5** TDS plots for  $n = 3$  with alternate on-off gas injection of CO. The cluster ions,  $\text{Rh}_3\text{N}_x\text{O}_y^+$ , grouped with the same  $y-x$  value ( $y-x = +1 - -1$ ) are shown from top to bottom. Even when a CO molecule is presumed to be originally attached, our mass resolution cannot distinguish it from two N atoms attached. Here, for the purpose of plotting in one figure, a cluster with  $k$  CO molecules attached is categorized as if the cluster had  $2k$  N atoms instead of the  $k$  CO molecules. The number of nitrogen atoms in the cluster is color-coded as red, green, blue, orange, brown, purple, and pink.

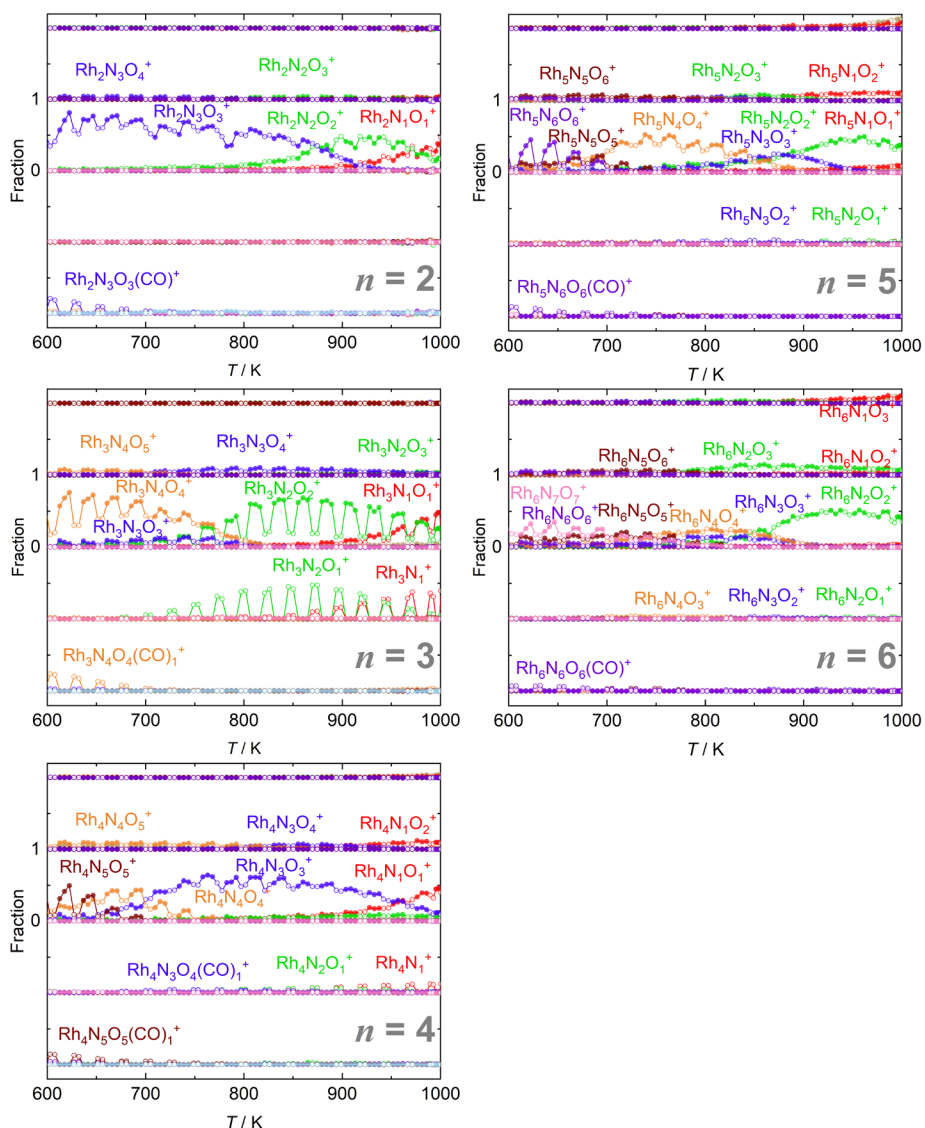

**Fig. S6** TDS plots for  $n = 2$ – $5$  with alternate on–off gas injection of CO. The cluster ions,  $\text{Rh}_n\text{N}_x\text{O}_y^+$ , grouped with the same  $y-x$  value ( $y-x = +2 - -2$ ) are shown from top to bottom. Even when a CO molecule is presumed to be originally attached, our mass resolution cannot distinguish it from two N atoms attached. Here, for the purpose of plotting in one figure, a cluster with  $k$  CO molecules attached is categorized as if the cluster had  $2k$  N atoms instead of the  $k$  CO molecules. In the alternate on–off gas injection of CO, the intensities of the clusters produced in the presence and absence of CO are depicted by open and filled circles, respectively. The number of nitrogen atoms in the cluster is color-coded as red, green, blue, orange, brown, purple, and pink.

For  $n = 4$ , the thermal desorption of NO occurred as follows:

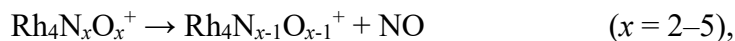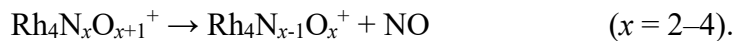

The reduction by CO proceeds as follows:

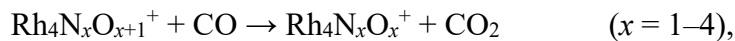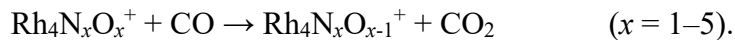

For  $n = 5$ , the thermal desorption of NO occurred as follows:

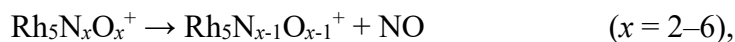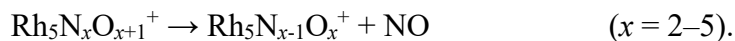

The reduction by CO proceeds as follows:

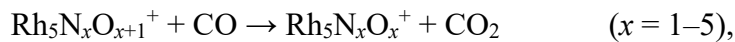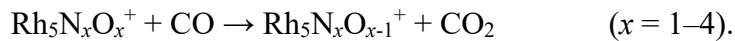

For  $n = 2$ ,  $\text{Rh}_2\text{N}_x\text{O}_x^+$  adsorbed a CO molecule on  $\text{Rh}_2\text{N}_3\text{O}_3^+$  below 700 K and sequentially desorbed NO molecules above 700 K. In addition, the intensities of  $\text{Rh}_2\text{N}_3\text{O}_4^+$  and  $\text{Rh}_2\text{N}_2\text{O}_3^+$  decreased when the CO gas was on, although the changes were not as prominent.

(A) Reaction route via <sup>3</sup>TS1a of NO dissociation

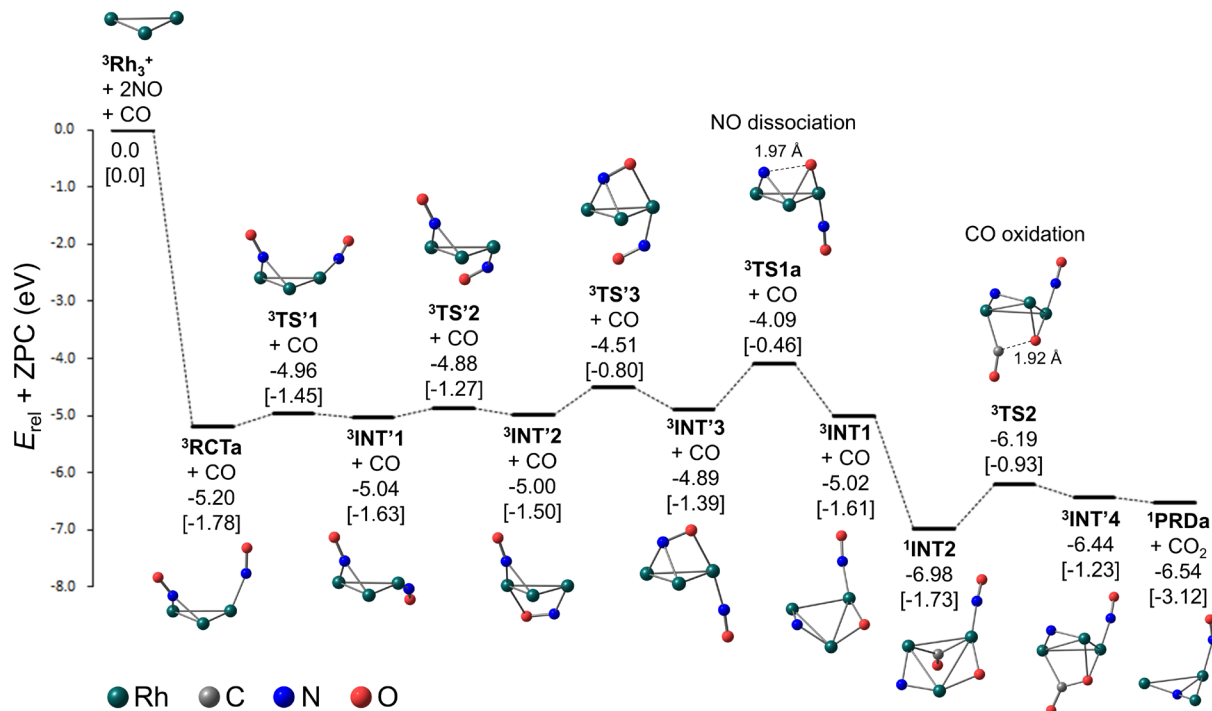

(B) Reaction route via <sup>3</sup>TS1b of NO dissociation

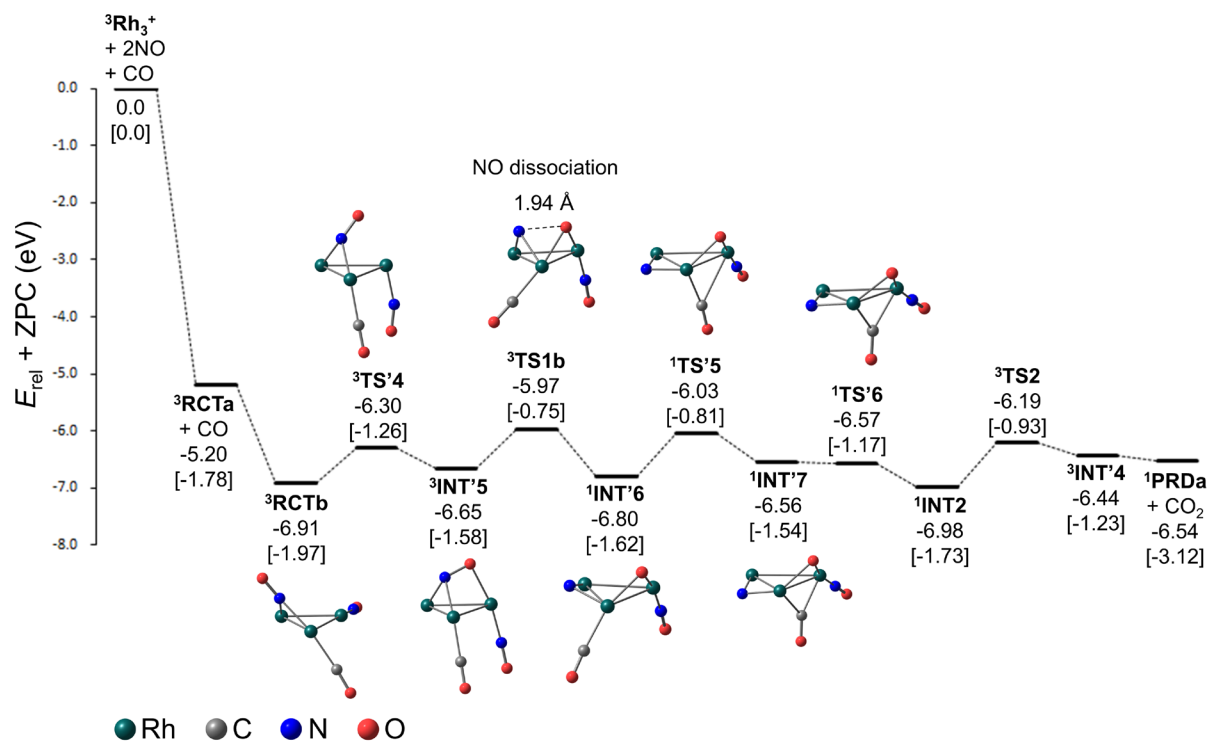

**Fig. S7** Overall zero-point corrected energy profiles for the reduction of  $\text{Rh}_3\text{N}_2\text{O}_2^+$  by CO calculated at the TPSSh-D3/def2-TZVP//def2-SV(P) level using the RI technique. **RCT**, **INT**, **PRD**, and **TS** represent the reactant, intermediate, product, and transition state, respectively. Superscripts on the labels indicate the values of spin multiplicity. Energy levels are given relative to the sum of energies of the bare Rh cluster, 2NO, and CO. Relative Gibbs free energy ( $T = 903$  K,  $P = 0.04$  atm) is also shown in square brackets.

(A) Reaction route via <sup>6</sup>TS1a of NO dissociation

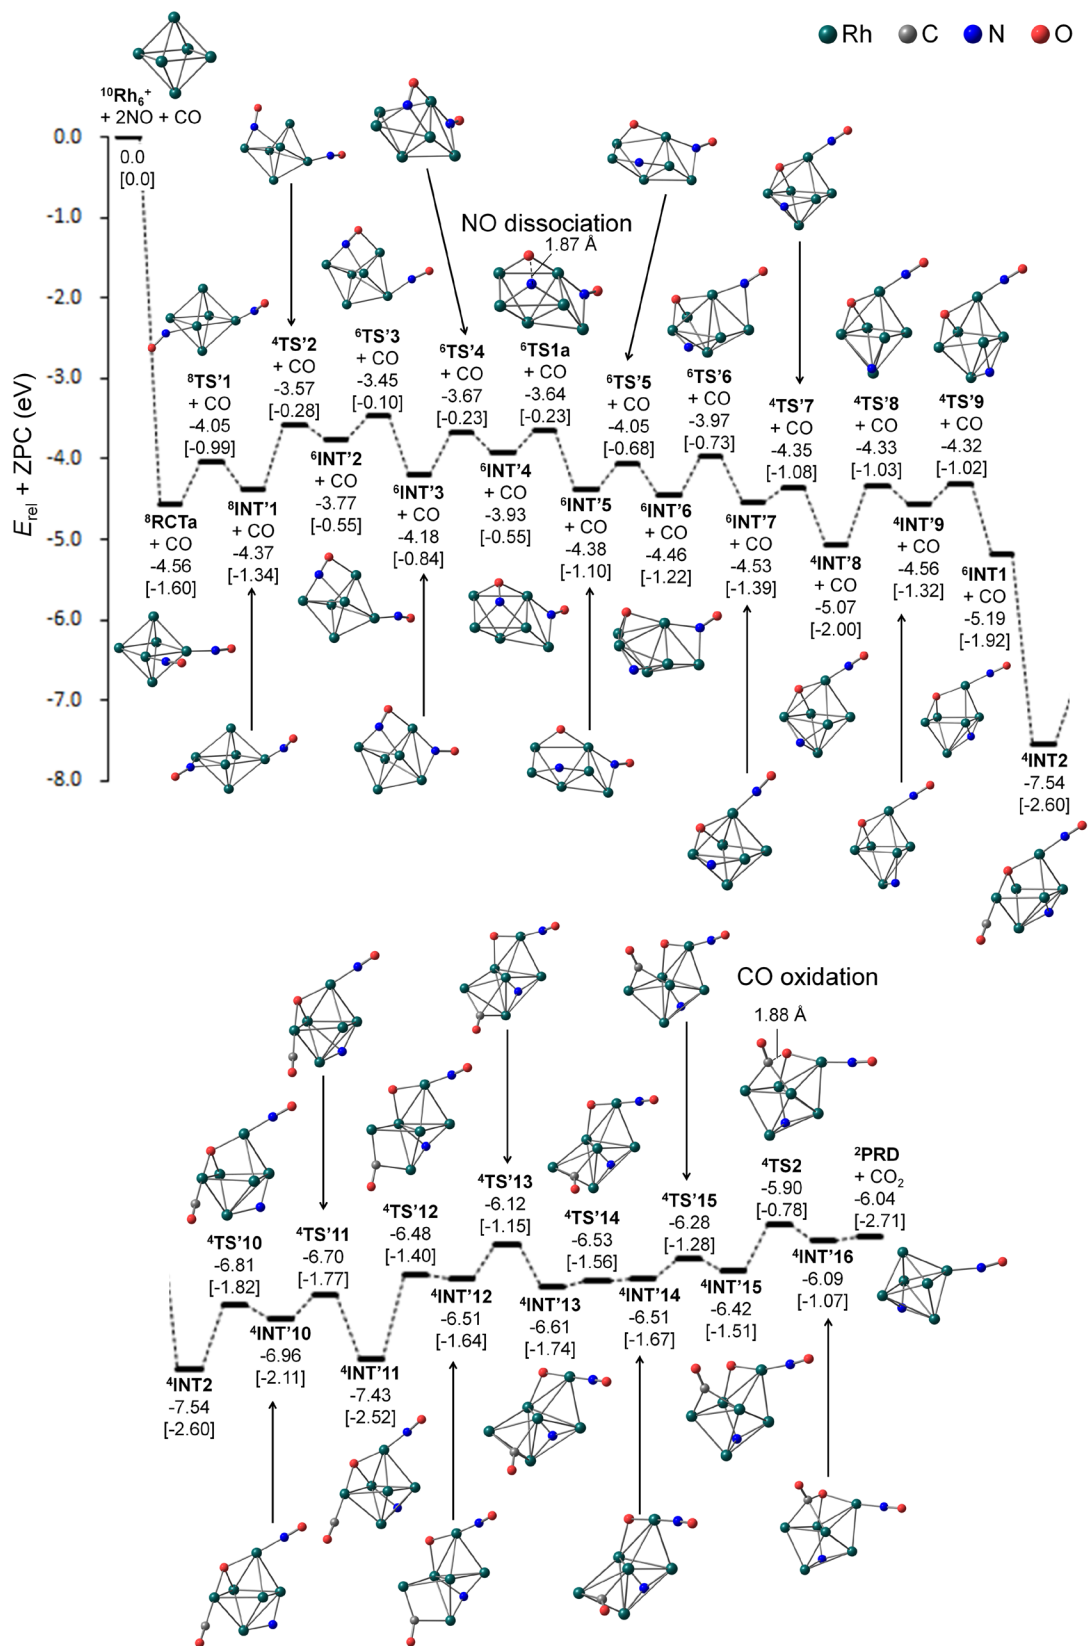

(B) Reaction route via <sup>6</sup>TS1b of NO dissociation

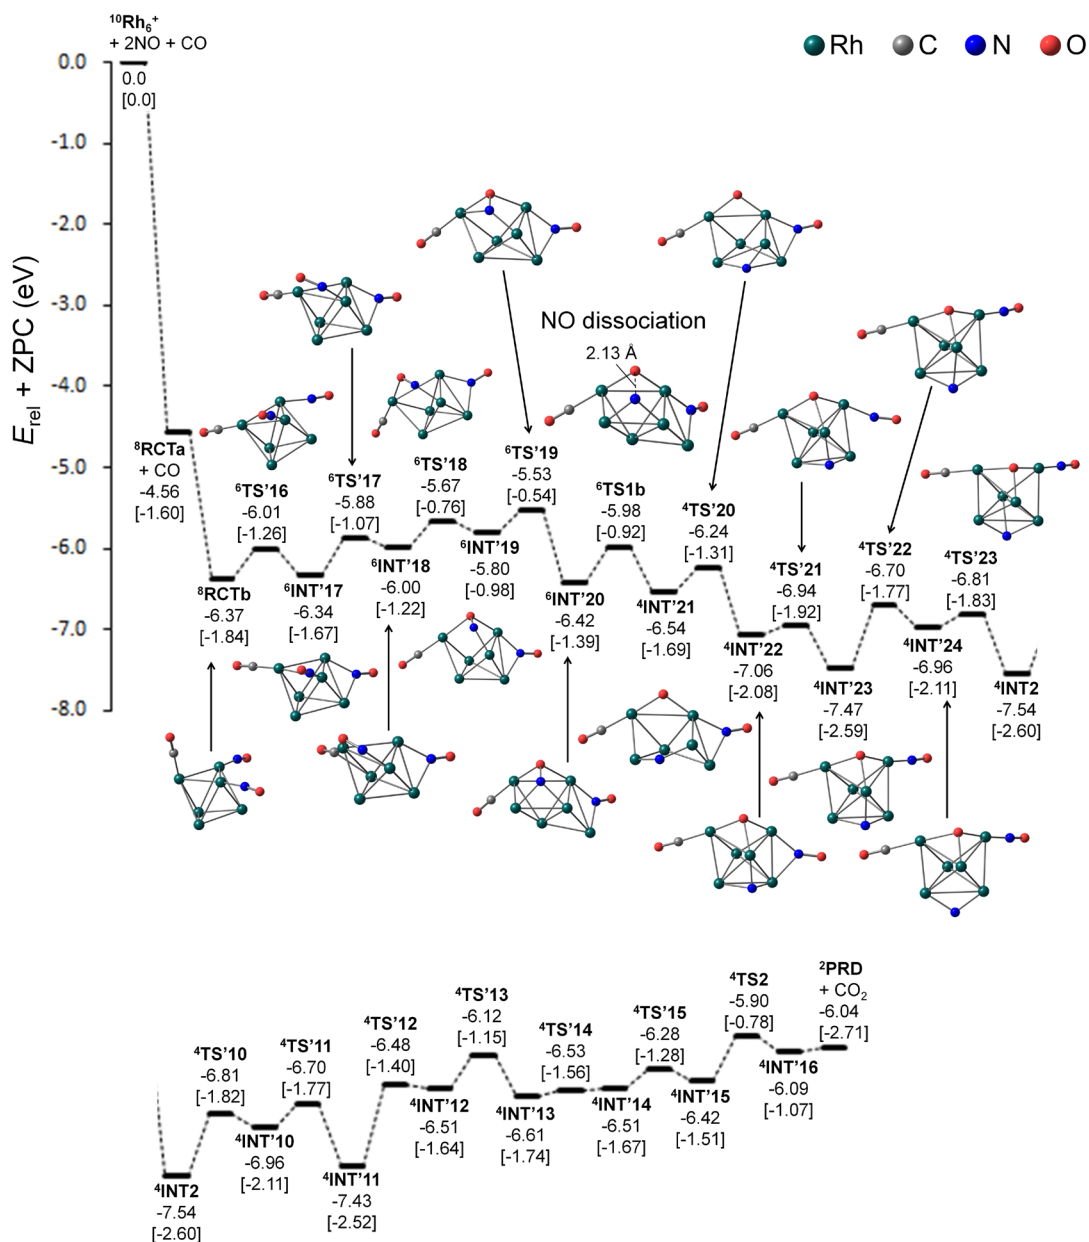

**Fig. S8** Overall zero-point corrected energy profiles for the reduction of Rh<sub>6</sub>N<sub>2</sub>O<sub>2</sub><sup>+</sup> by CO were calculated at the TPSSh-D3/def2-TZVP//def2-SV(P) level using the RI technique. **RCT**, **INT**, **PRD**, and **TS** represent the reactant, intermediate, product, and transition state, respectively. Superscripts on the labels indicate the values of spin multiplicity. Energy levels are given relative to the sum of energies of the bare Rh cluster, 2NO, and CO. Relative Gibbs free energy ( $T = 903$  K,  $P = 0.04$  atm) is also shown in square brackets.

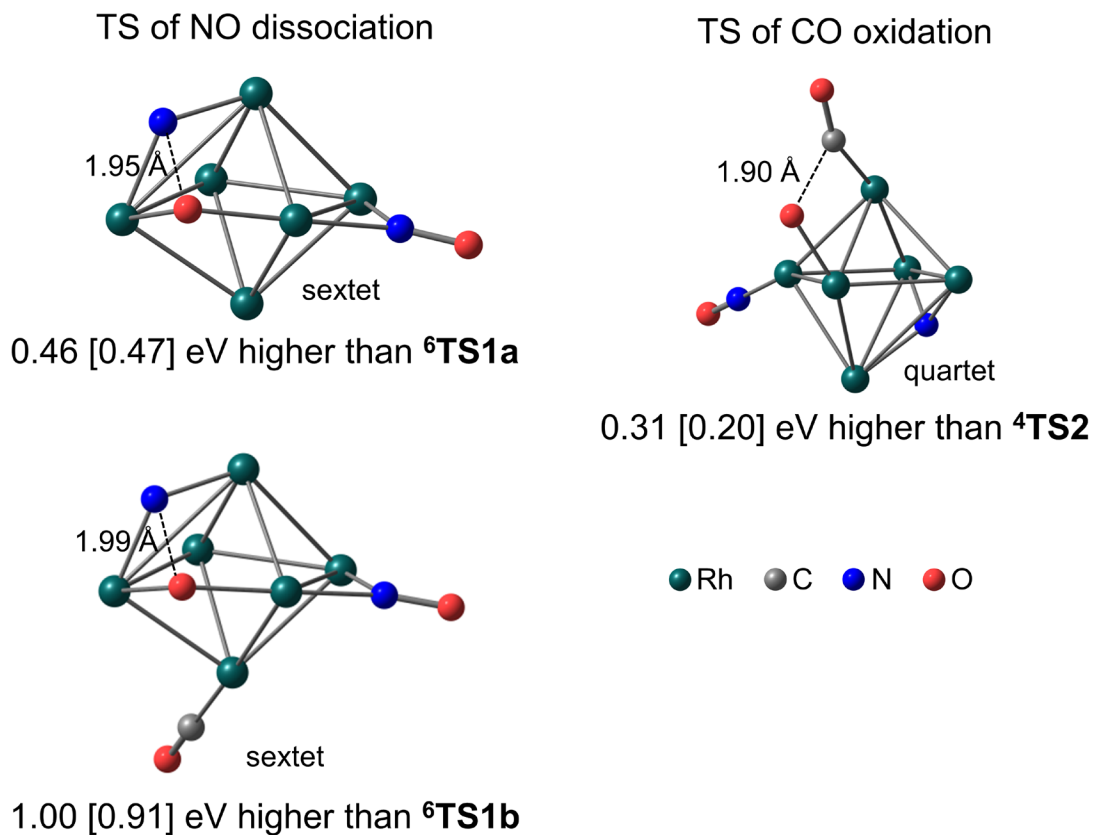

**Fig. S9** Octahedral Rh<sub>6</sub> structures at transition states for NO dissociation and CO oxidation and relative stability with zero-point corrected energy. Relative Gibbs free energy ( $T = 903$  K,  $P = 0.04$  atm) is also shown in square brackets.



## Optimized structures and energies determined at the RI-TPSSH-D3/def2-SV(P) level

The reduction of  $\text{Rh}_3\text{N}_2\text{O}_2^+$  by CO (Fig. S7)

### • $^3\text{Rh}_3^+$

2S + 1 = 3

|        |                             |                 |                 |
|--------|-----------------------------|-----------------|-----------------|
| Rh     | 1.125341041456              | 0.828515004958  | 0.077952224569  |
| Rh     | 0.171163440151              | -1.362149545773 | -0.569001835643 |
| Rh     | -1.296504481607             | 0.533634540813  | 0.491049611077  |
| ENERGY | = -331.185472660160 hartree |                 |                 |

(A) Reaction route via  $^3\text{TS1a}$  of NO dissociation

### • $^3\text{RCTa}$

2S + 1 = 3

|        |                             |                 |                 |
|--------|-----------------------------|-----------------|-----------------|
| Rh     | -1.610282247498             | 0.335251797184  | -0.629829456542 |
| Rh     | -0.318441625204             | -0.995956682929 | 1.295841804758  |
| Rh     | 0.249189447406              | 1.402249369867  | 0.712592965365  |
| O      | 2.560124095779              | 1.228160558207  | -0.953891907410 |
| N      | 1.769905806605              | 1.550060268752  | -0.191397978515 |
| O      | -0.465537337750             | -2.157910681635 | -1.265269889183 |
| N      | -0.670638686392             | -1.275261849496 | -0.515564346243 |
| ENERGY | = -590.965087078240 hartree |                 |                 |

### • $^3\text{TS}'1$

2S + 1 = 3

|        |                             |                 |                 |
|--------|-----------------------------|-----------------|-----------------|
| Rh     | 1.423599299598              | -1.480811819985 | -0.197679153640 |
| Rh     | 0.780422397128              | 1.019109219334  | 0.359644560838  |
| Rh     | -0.221218131310             | -0.947390006272 | 1.626005211763  |
| O      | 0.130176428851              | 0.038566489751  | -2.206247517657 |
| N      | 0.551944252955              | -0.111825400966 | -1.120935954725 |
| O      | -2.785398276091             | -0.257439975631 | 2.826771590081  |
| N      | -1.720963107298             | -0.530806611003 | 2.523803900085  |
| ENERGY | = -590.955698394720 hartree |                 |                 |

### • $^3\text{INT}'1$

2S + 1 = 3

|    |                |                 |                 |
|----|----------------|-----------------|-----------------|
| Rh | 1.586615507212 | -1.408544157192 | -0.065543097308 |
| Rh | 0.580916948354 | 0.978642060626  | 0.381219821065  |

|    |                 |                 |                 |
|----|-----------------|-----------------|-----------------|
| Rh | -0.535133207550 | -1.043554180003 | 1.333941924798  |
| O  | 0.500527607991  | -0.024594927153 | -2.283213446400 |
| N  | 0.753963915806  | -0.173135451086 | -1.147540240130 |
| O  | -1.787737159398 | 0.170648143904  | 3.640229658247  |
| N  | -1.509973304808 | -0.389816160905 | 2.685153529452  |

ENERGY = -590.959818801550 hartree

• **<sup>3</sup>TS'2**

2S + 1 = 3

|    |                 |                 |                 |
|----|-----------------|-----------------|-----------------|
| Rh | 1.613407020412  | -0.878801382110 | 0.149336650101  |
| Rh | -0.467127221243 | 0.709774399868  | 0.316067473953  |
| Rh | -0.613086186608 | -1.565246839533 | 1.335788249335  |
| O  | 0.378867466602  | -0.162093994745 | -2.280449673397 |
| N  | 0.466015200720  | -0.176841920684 | -1.110829736682 |
| O  | -1.670029971876 | 0.470414889842  | 2.813794427071  |
| N  | -1.549483444175 | -0.667803257411 | 2.587655246354  |

ENERGY = -590.954931440470 hartree

• **<sup>3</sup>INT'2**

2S + 1 = 3

|    |                 |                 |                 |
|----|-----------------|-----------------|-----------------|
| Rh | 1.579480121007  | -0.481615636463 | 0.250539679010  |
| Rh | -0.526202896597 | 0.862040100430  | 0.292725168775  |
| Rh | -0.806037591490 | -1.572750795278 | 1.028507104905  |
| O  | 0.758318901401  | 0.406467650925  | -2.320318000491 |
| N  | 0.601736370895  | 0.383763597102  | -1.163625033643 |
| O  | -1.530008177666 | 0.651825465017  | 2.195830496419  |
| N  | -1.470217465881 | -0.542146207690 | 2.355297090722  |

ENERGY = -590.958058169380 hartree

• **<sup>3</sup>TS'3**

2S + 1 = 3

|    |                 |                 |                 |
|----|-----------------|-----------------|-----------------|
| Rh | 1.641706441754  | -0.391016398619 | 0.401710829593  |
| Rh | -0.504679309123 | 1.046937061922  | 0.279372841569  |
| Rh | -0.808360645113 | -1.491538709787 | 0.672318080909  |
| O  | -0.086915726900 | -0.984347701099 | -1.355191316367 |
| N  | 0.439026167009  | 0.108928797412  | -1.071020818677 |
| O  | -1.260695962548 | 0.277863332050  | 2.619097052705  |
| N  | -1.262366334174 | -0.838116136007 | 2.266885349625  |

ENERGY = -590.939279267710 hartree

• **<sup>3</sup>INT'3**

2S + 1 = 3

|    |                 |                 |                 |
|----|-----------------|-----------------|-----------------|
| Rh | 1.627549472084  | -0.360776705759 | 0.433283558764  |
| Rh | -0.407119091254 | 1.138556723314  | -0.002570679666 |
| Rh | -0.866632485833 | -1.339985890831 | 0.745882940858  |
| O  | -0.147753357574 | -1.177227707670 | -1.182385736187 |
| N  | 0.488249666910  | -0.067293397845 | -1.153050714819 |
| O  | -1.473201891482 | -0.944598936613 | 3.537087814711  |
| N  | -1.294449367094 | -1.180588639655 | 2.438235297541  |

ENERGY = -590.950102885160 hartree

• **<sup>3</sup>TS1a of NO dissociation step**

2S + 1 = 3

|    |                 |                 |                 |
|----|-----------------|-----------------|-----------------|
| Rh | 1.708640672150  | -0.325440617473 | 0.207707874327  |
| Rh | -0.356689252472 | 1.333594296028  | -0.244960326629 |
| Rh | -0.838494098253 | -1.021035229447 | 0.663067024440  |
| O  | 0.263499408343  | -1.435267976475 | -0.814256920089 |
| N  | 0.774132098965  | 0.418134941279  | -1.229024964944 |
| O  | -1.868172940482 | -0.169506033278 | 3.248553815580  |
| N  | -1.570512994248 | -0.533843043632 | 2.212169502319  |

ENERGY = -590.909440503660 hartree

• **<sup>3</sup>INT1**

2S + 1 = 3

|    |                 |                 |                 |
|----|-----------------|-----------------|-----------------|
| Rh | 1.488534966377  | 0.324717082776  | 0.105878723218  |
| Rh | -0.096655684949 | -1.551799531845 | -1.147001285499 |
| Rh | -0.997255292317 | 0.731475639578  | 0.768461998789  |
| O  | -1.589430809176 | -0.579783197411 | -0.431594493200 |
| N  | 1.312762848346  | -0.539834746461 | -1.389649909904 |
| O  | -0.812004106673 | 3.553599282310  | 1.407540308381  |
| N  | -0.793820150608 | 2.419452091053  | 1.296417840217  |

ENERGY = -590.943416492590 hartree

• **<sup>3</sup>INT2**

2S + 1 = 1

|    |                |                 |                |
|----|----------------|-----------------|----------------|
| Rh | 1.289249248256 | -0.150355884742 | 1.239921144446 |
| Rh | 1.160159253892 | 2.219093955208  | 0.150848327220 |

|    |                 |                 |                 |
|----|-----------------|-----------------|-----------------|
| Rh | -1.097581658525 | 0.213301306559  | -0.069433553210 |
| O  | -0.579727218112 | 1.940017631694  | -0.607576059265 |
| N  | 2.376498412414  | 1.264678082680  | 0.867558666765  |
| O  | -2.691427082991 | -2.221507906900 | 0.213251393116  |
| N  | -2.062462516566 | -1.275317870696 | 0.161246440374  |
| O  | 1.077428703641  | -1.272723783532 | -1.469427236486 |
| C  | 0.648345735993  | -0.717185530271 | -0.544351154959 |

ENERGY = -704.241261679980 hartree

• **<sup>3</sup>TS2 of CO oxidation step**

2S + 1 = 3

|    |                 |                 |                 |
|----|-----------------|-----------------|-----------------|
| Rh | 0.756264415058  | -1.399115417389 | 0.247663993609  |
| Rh | 0.075217653933  | 1.519008427737  | -0.300428345132 |
| Rh | -1.383672933596 | -0.500305020570 | -1.121976941240 |
| O  | 0.144428799301  | 0.411319879196  | -1.941124068236 |
| N  | 0.819266175446  | 0.331468911336  | 0.764096262380  |
| O  | -3.623229798059 | -1.207432825753 | 0.580446021569  |
| N  | -2.768512176330 | -0.999708566017 | -0.141770461455 |
| O  | 1.929705145146  | -1.365704920686 | -2.532543897532 |
| C  | 1.301448581104  | -1.088442889859 | -1.610144168955 |

ENERGY = -704.221247242400 hartree

• **<sup>3</sup>INT'4**

2S + 1 = 3

|    |                 |                 |                 |
|----|-----------------|-----------------|-----------------|
| Rh | 0.789722986870  | -1.399306335144 | 0.202327217377  |
| Rh | 0.027733799757  | 1.492022803833  | -0.285612202783 |
| Rh | -1.377775673360 | -0.522099054172 | -1.114875302432 |
| O  | 0.354420938445  | 0.224899894681  | -2.032412621148 |
| N  | 0.692137147427  | 0.263511640795  | 0.817231599688  |
| O  | -3.606106591623 | -1.024151146017 | 0.655860047155  |
| N  | -2.796944485111 | -0.821945819477 | -0.118554476185 |
| O  | 1.985841268874  | -1.355963360764 | -2.368777887289 |
| C  | 1.175129585839  | -0.805433804867 | -1.695537616565 |

ENERGY = -704.237092808460 hartree

• **<sup>1</sup>PRD1**

2S + 1 = 1

|    |                |                 |                |
|----|----------------|-----------------|----------------|
| Rh | 1.042562532898 | -0.032340282990 | 0.081292216992 |
|----|----------------|-----------------|----------------|

|    |                 |                |                |
|----|-----------------|----------------|----------------|
| Rh | 0.944995594080  | 2.091183925900 | 2.532111055505 |
| Rh | -0.772448098939 | 2.217269069161 | 0.197083313527 |
| N  | 0.821701414123  | 1.477425682133 | 0.911972130781 |
| O  | -3.095890380049 | 0.963754146328 | 1.187594676448 |
| N  | -2.452316182111 | 1.691894806466 | 0.577640265746 |

ENERGY = -515.795229429760 hartree

(B) Reaction route via <sup>3</sup>TS1b of NO dissociation

• <sup>3</sup>RCTb

2S + 1 = 3

|    |                 |                 |                 |
|----|-----------------|-----------------|-----------------|
| Rh | 1.368857811164  | -1.105148041110 | 0.291850742096  |
| Rh | -0.112873104238 | -0.023966553768 | -1.590850110067 |
| Rh | -0.976454071732 | -0.340173067073 | 0.767760123805  |
| O  | 2.564689105766  | 1.135605110336  | -0.828209714161 |
| N  | 1.618706420588  | 0.448401709885  | -0.778162716308 |
| O  | -1.343501628325 | -1.491952031374 | 3.419866477061  |
| N  | -1.295508178307 | -0.954102172454 | 2.416879988206  |
| O  | -2.555780466600 | -1.693533942421 | -2.411748158444 |
| C  | -1.679546964070 | -1.034452451292 | -2.096213595346 |

ENERGY = -704.256258579230 hartree

• <sup>3</sup>TS'4

2S + 1 = 3

|    |                 |                 |                 |
|----|-----------------|-----------------|-----------------|
| Rh | 1.544115408304  | -1.519803193607 | 0.023088335989  |
| Rh | -0.258676908772 | -0.356092140361 | -1.421947084366 |
| Rh | -0.111708161657 | 0.195769223921  | 1.257708545493  |
| O  | 1.825692662420  | 1.203536885234  | -0.057987809044 |
| N  | 1.484187631632  | 0.202991245090  | -0.646596211483 |
| O  | -2.008345844959 | -1.817326761882 | 1.993143245407  |
| N  | -1.341115701957 | -0.899928616794 | 1.865187298016  |
| O  | -2.870601690317 | -1.959030299979 | -1.478726390979 |
| C  | -1.910676475985 | -1.342878491913 | -1.524576677727 |

ENERGY = -704.232817776890 hartree

• <sup>1</sup>INT'5

2S + 1 = 3

|    |                |                 |                 |
|----|----------------|-----------------|-----------------|
| Rh | 1.578771822636 | -1.528543736324 | -0.019269556400 |
|----|----------------|-----------------|-----------------|

|    |                 |                 |                 |
|----|-----------------|-----------------|-----------------|
| Rh | -0.265442645734 | -0.356525337151 | -1.425816628794 |
| Rh | -0.070727570588 | 0.185920486962  | 1.251905450600  |
| O  | 1.421989495650  | 1.103310121214  | 0.217472648584  |
| N  | 1.517790627405  | 0.215057066878  | -0.688936803046 |
| O  | -2.128176130917 | -1.591879691706 | 2.224668533233  |
| N  | -1.313794708696 | -0.874338540290 | 1.888196748935  |
| O  | -2.853020797726 | -1.989157897298 | -1.602889644353 |
| C  | -1.909350643032 | -1.346531021285 | -1.601630272758 |

ENERGY = -704.243230963500

• **<sup>3</sup>TS1b**

2S + 1 = 3

|    |                 |                 |                 |
|----|-----------------|-----------------|-----------------|
| Rh | 0.878504833538  | -1.919926679189 | 0.051749258071  |
| Rh | -0.817029627395 | -0.043491740262 | -1.015534492590 |
| Rh | 0.138994897657  | -0.019893108444 | 1.594342228130  |
| O  | 0.601862638459  | 0.976153111459  | 0.061482167785  |
| N  | 0.994324759031  | -0.593965708432 | -1.102322001331 |
| O  | -1.267191273201 | -1.675744990588 | 3.532285287440  |
| N  | -0.628971905913 | -1.017711281874 | 2.857914953370  |
| O  | -2.530310146017 | -2.092594687278 | -2.533656727899 |
| C  | -1.918326917154 | -1.308163828392 | -1.979032783976 |

ENERGY = -704.207072257880 hartree

• **<sup>1</sup>INT'6**

2S + 1 = 1

|    |                 |                 |                 |
|----|-----------------|-----------------|-----------------|
| Rh | 1.023346245559  | -1.886973373918 | -0.241857727622 |
| Rh | -0.545208989451 | -0.047076637621 | -1.317598628215 |
| Rh | -0.048441640189 | -0.030070443686 | 1.419604935003  |
| O  | 0.303704055257  | 1.082367548747  | -0.019584108440 |
| N  | 0.834559253340  | -1.188000069314 | -1.778487371652 |
| O  | -1.229734556419 | -1.964165460162 | 3.251217411106  |
| N  | -0.685788558611 | -1.207003779516 | 2.590153679361  |
| O  | -2.709194704441 | -1.756457081360 | -2.770862816572 |
| C  | -1.888242106490 | -1.143013945652 | -2.282577472754 |

ENERGY = -704.234924065090 hartree

• **<sup>1</sup>TS'5**

2S + 1 = 1

|    |                 |                 |                 |
|----|-----------------|-----------------|-----------------|
| Rh | 1.196443143270  | -1.966770163360 | -0.425681586533 |
| Rh | -0.184054541648 | 0.031268762513  | -1.369885328817 |
| Rh | -0.465750294378 | -0.048851251108 | 1.249291098057  |
| O  | 0.160461430804  | 1.285536648301  | 0.148422911150  |
| N  | 0.815495644249  | -1.370315543463 | -1.987560859418 |
| O  | -1.526798986729 | -2.067954051501 | 3.087027967410  |
| N  | -1.098572873633 | -1.289747644227 | 2.369782926102  |
| O  | -2.701282479228 | -1.576060788008 | -0.806876207748 |
| C  | -1.755547356637 | -0.941805203192 | -0.890545641451 |

ENERGY = -704.205763471610 hartree

• **<sup>1</sup>INT'7**

2S + 1 = 1

|    |                 |                 |                 |
|----|-----------------|-----------------|-----------------|
| Rh | 1.050255196050  | -1.983006882593 | -0.517579496736 |
| Rh | -0.144545759187 | 0.139252061341  | -1.460894485948 |
| Rh | -0.500118731768 | -0.216184847877 | 1.258684910274  |
| O  | 0.214859043594  | 1.156826300875  | 0.183376400723  |
| N  | 0.593081800048  | -1.388235213892 | -2.060762155990 |
| O  | -1.838101306352 | -1.764705699111 | 3.352380870295  |
| N  | -1.268499201512 | -1.204583606716 | 2.541823112436  |
| O  | -2.507914867069 | -1.436771404857 | -0.586525164882 |
| C  | -1.558124875551 | -0.837320928469 | -0.295347804245 |

ENERGY = -704.226720588340 hartree

• **<sup>1</sup>TS'6**

2S + 1 = 1

|    |                 |                 |                 |
|----|-----------------|-----------------|-----------------|
| Rh | 0.965775992707  | -1.997770301900 | -0.511576296729 |
| Rh | -0.102163563231 | 0.169913915592  | -1.473671542469 |
| Rh | -0.505076797715 | -0.200007885001 | 1.264915930281  |
| O  | 0.088449075485  | 1.214030891741  | 0.180203529755  |
| N  | 0.708293570497  | -1.308704468929 | -2.071770276015 |
| O  | -1.746673018433 | -1.770188716816 | 3.401993087291  |
| N  | -1.215039796249 | -1.211273422573 | 2.565632649408  |
| O  | -2.341227447469 | -1.625351278466 | -0.621667018443 |
| C  | -1.417556497546 | -0.991277692113 | -0.312357010229 |

ENERGY = -704.226462316210 hartree

The reduction of  $\text{Rh}_6\text{N}_2\text{O}_2^+$  by CO (Fig. S8)

•  $^{10}\text{Rh}_6^+$

2S + 1 = 10

|    |                 |                 |                 |
|----|-----------------|-----------------|-----------------|
| Rh | -1.120815059854 | 1.129585470686  | 0.872602282306  |
| Rh | -0.704281439759 | -1.403909755394 | 0.911836627429  |
| Rh | 1.121978655783  | -1.130372451882 | -0.874032940789 |
| Rh | -1.241296056260 | -0.224276143089 | -1.302640116730 |
| Rh | 0.701620296871  | 1.402453884167  | -0.911897290320 |
| Rh | 1.242793603218  | 0.226518996512  | 1.304131437102  |

ENERGY = -662.847356943540 hartree

(A) Reaction route via  $^6\text{TS1a}$  of NO dissociation

•  $^8\text{RCTa}$

2S + 1 = 8

|    |                 |                 |                 |
|----|-----------------|-----------------|-----------------|
| Rh | -1.326060208705 | 0.462002009217  | -0.748182096430 |
| Rh | -1.263616205710 | -0.410608688709 | 1.664172363482  |
| Rh | -0.804518013096 | -2.072827737410 | -0.150795392996 |
| Rh | 1.176161074705  | -1.083968659924 | 1.314225988225  |
| Rh | 1.058614089639  | -0.367091292904 | -1.141435808718 |
| Rh | 0.484869961809  | 1.330243351049  | 0.837090709187  |
| O  | 0.088834280776  | -3.868777515709 | -2.275291858934 |
| N  | -0.362509140479 | -3.230037015663 | -1.435976809811 |
| O  | 2.969659521778  | 1.428425448582  | -2.387465822088 |
| N  | 2.237498914290  | 0.618325426479  | -2.023547105912 |

ENERGY = -922.595595959430 hartree

•  $^8\text{TS}^1$

2S + 1 = 8

|    |                 |                 |                 |
|----|-----------------|-----------------|-----------------|
| Rh | -1.605538801870 | 0.893003621325  | -0.920996442645 |
| Rh | -1.057357098911 | -1.549573667235 | -0.050284130797 |
| Rh | -0.346604119737 | -0.764106663497 | -2.446306489705 |
| Rh | 1.450760765379  | -1.017966491758 | -0.563466580354 |
| Rh | 0.870545281316  | 1.367533974637  | -1.594009473887 |
| Rh | 0.109420679382  | 0.724171336173  | 0.835139112586  |
| O  | -0.900063162612 | -4.450450868616 | -0.308160644913 |
| N  | -1.017963335997 | -3.319568357309 | -0.140567908964 |



|   |                |                |                 |
|---|----------------|----------------|-----------------|
| O | 3.698711242157 | 0.758557498737 | -0.356311892138 |
| N | 2.868548704914 | 0.097700214903 | -0.831542366588 |

ENERGY = -922.577012397540 hartree

• **<sup>8</sup>INT'1**

2S + 1 = 8

|    |                 |                 |                 |
|----|-----------------|-----------------|-----------------|
| Rh | -1.669395922866 | 0.863325915294  | -0.914914399809 |
| Rh | -1.132658159219 | -1.601739789754 | -0.036461521360 |
| Rh | -0.318203129029 | -0.739851434697 | -2.350825102285 |
| Rh | 1.437160616775  | -0.966552609515 | -0.496261951594 |
| Rh | 1.045731553170  | 1.318376612485  | -1.542723983971 |
| Rh | 0.022352691004  | 0.753291801091  | 0.793141360636  |
| O  | -0.829056266340 | -4.454052368761 | -0.490616529862 |
| N  | -1.002702811173 | -3.355733010638 | -0.199745662305 |
| O  | 3.819997932286  | 0.757697667340  | -0.828724405660 |
| N  | 2.714062911165  | 0.432629186088  | -1.053929988893 |

ENERGY = -922.589598165960 hartree

• **<sup>4</sup>TS'2**

2S + 1 = 4

|    |                 |                 |                 |
|----|-----------------|-----------------|-----------------|
| Rh | -1.375037010466 | 1.024090191593  | -0.603732489585 |
| Rh | -1.069904055683 | -1.098198327043 | 0.863415313318  |
| Rh | 0.449489103295  | -0.587810743432 | -1.133175989651 |
| Rh | 1.681390264858  | 0.252609889981  | 0.885820430453  |
| Rh | 0.696883200848  | 2.394864281709  | -0.088753706886 |
| Rh | -0.529068374312 | 1.140347106698  | 1.846408162597  |
| O  | -2.921904804514 | -3.163711307965 | 0.029205542203  |
| N  | -2.043587032507 | -2.494138491499 | 0.344712234201  |
| O  | 2.586086745020  | 1.033532481335  | -1.574555539334 |
| N  | 2.377113789850  | 1.498033131888  | -0.481893260873 |

ENERGY = -922.561052609470 hartree

• **<sup>6</sup>INT'2**

2S + 1 = 6

|    |                 |                 |                 |
|----|-----------------|-----------------|-----------------|
| Rh | -0.973230234137 | 0.329144036540  | -1.173193746767 |
| Rh | -0.694754947692 | -1.835165011216 | 0.233117943341  |
| Rh | 0.917710822329  | -1.202914187184 | -1.650127040458 |
| Rh | 1.977625566842  | -0.357531414183 | 0.494387565437  |

|    |                 |                 |                 |
|----|-----------------|-----------------|-----------------|
| Rh | 1.025094791372  | 1.825543016919  | -0.521345475867 |
| Rh | -0.293209196144 | 0.476415143880  | 1.276569935273  |
| O  | -2.662441372078 | -3.790857511807 | -0.563399401103 |
| N  | -1.763353810969 | -3.132181943648 | -0.285186207432 |
| O  | 2.403801616805  | 0.100352517488  | -2.151990704929 |
| N  | 2.536654686852  | 0.772519042936  | -1.092106932205 |

ENERGY = -922.567550622510 hartree

• **<sup>6</sup>TS'3**

2S + 1 = 6

|    |                 |                 |                 |
|----|-----------------|-----------------|-----------------|
| Rh | -1.031777300965 | 0.473799727280  | -1.092330288459 |
| Rh | -0.947765939918 | -1.656486877210 | 0.429842950946  |
| Rh | 0.675345746558  | -1.278732646609 | -1.579376890691 |
| Rh | 1.885827135399  | -0.481614409075 | 0.449468114968  |
| Rh | 1.137617057516  | 1.771806691616  | -0.579605257427 |
| Rh | -0.223511615152 | 0.641484688257  | 1.334823827789  |
| O  | -1.074316376934 | -4.035237726453 | -1.271498680243 |
| N  | -0.976333086378 | -3.042498867124 | -0.690589278990 |
| O  | 2.295429616932  | -0.128457087663 | -2.186839535155 |
| N  | 2.524867473579  | 0.542559175442  | -1.146518855434 |

ENERGY = -922.555807462400 hartree

• **<sup>6</sup>INT'3**

2S + 1 = 6

|    |                 |                 |                 |
|----|-----------------|-----------------|-----------------|
| Rh | -1.055163544530 | 0.399647694810  | -1.056700167194 |
| Rh | -0.813725588715 | -1.633324056658 | 0.623565830962  |
| Rh | 0.729346004530  | -1.309809126440 | -1.831006857410 |
| Rh | 1.709785388417  | -0.613423542436 | 0.476971658645  |
| Rh | 1.119575914756  | 1.684646925164  | -0.607403633441 |
| Rh | -0.283969061874 | 0.794730098819  | 1.373639627744  |
| O  | -1.042982547937 | -3.510781466166 | -1.267445362231 |
| N  | -0.522862880067 | -2.464759756644 | -1.046899890020 |
| O  | 2.452438374488  | -0.099535374066 | -2.126138278426 |
| N  | 2.516816433090  | 0.418798006510  | -0.983547301551 |

ENERGY = -922.585304441100 hartree

• **<sup>6</sup>TS'4**

2S + 1 = 6

|    |                 |                 |                 |
|----|-----------------|-----------------|-----------------|
| Rh | -0.845348868738 | 0.809671262383  | -1.693963109813 |
| Rh | -0.129471397064 | -2.328618853677 | 1.075793094410  |
| Rh | 0.545288198659  | -1.400778620170 | -1.578109903443 |
| Rh | 1.821861326459  | -0.578672601582 | 0.540697144001  |
| Rh | 1.142647829496  | 1.792089294136  | -0.475839724648 |
| Rh | -0.708514804402 | 0.147945865987  | 0.700749982149  |
| O  | -1.464776195648 | -3.353215967782 | -1.042095181253 |
| N  | -0.632088421359 | -2.574549542381 | -0.702268617214 |
| O  | 2.205912764372  | -0.132904847906 | -2.144302230863 |
| N  | 2.324747267442  | 0.423382374245  | -1.029759851900 |

ENERGY = -922.568534322470 hartree

• **<sup>6</sup>INT<sup>4</sup>**

2S + 1 = 6

|    |                 |                 |                 |
|----|-----------------|-----------------|-----------------|
| Rh | -0.206827572208 | 1.138456692054  | -2.120962080153 |
| Rh | -0.275329256354 | -2.214192188378 | 1.209208732837  |
| Rh | 0.388034567630  | -1.518546699620 | -1.510916429986 |
| Rh | 1.829363401440  | -0.729450118393 | 0.462688564370  |
| Rh | 1.274162810998  | 1.814948952227  | -0.106975966611 |
| Rh | -0.667942444348 | 0.127072450555  | 0.245498063136  |
| O  | -1.261073553721 | -3.741791575624 | -0.823092315097 |
| N  | -0.577767735754 | -2.812386161146 | -0.532694880392 |
| O  | 1.624700988820  | 0.134016130901  | -2.180250942020 |
| N  | 2.205551002559  | 0.444344605347  | -1.037338320011 |

ENERGY = -922.577834609340 hartree

• **<sup>6</sup>TS1a** of NO dissociation

2S + 1 = 6

|    |                 |                 |                 |
|----|-----------------|-----------------|-----------------|
| Rh | -0.181533728484 | 1.081852744405  | -2.107700446441 |
| Rh | -0.302997004634 | -2.238258085873 | 1.137968449173  |
| Rh | 0.405791648949  | -1.499907529206 | -1.475316761401 |
| Rh | 1.896986151911  | -0.811670844968 | 0.469155797704  |
| Rh | 1.213490686139  | 1.923617635800  | -0.174304133329 |
| Rh | -0.638181748951 | 0.172748661813  | 0.302884515267  |
| O  | -1.372489271652 | -3.758800192484 | -0.841733541087 |
| N  | -0.651700888867 | -2.856621588249 | -0.580447957928 |
| O  | 1.408174385022  | 0.028775205756  | -2.262174842209 |

N 2.271243028566 0.554043869004 -0.684724023750  
ENERGY = -922.557848488990 hartree

• **6INT'5**

2S + 1 = 6

Rh -0.177268142074 1.220741951105 -2.142057330846  
Rh -0.294095691274 -2.232942744112 1.118179267658  
Rh 0.327558449001 -1.593080354816 -1.466311635447  
Rh 1.890084124206 -0.935823818470 0.493121333596  
Rh 1.220696741446 2.060477382699 -0.201919352747  
Rh -0.562701839664 0.195524291102 0.245063102575  
O -1.184967080005 -4.036336488613 -0.718033026621  
N -0.577830712098 -3.036515026382 -0.554754245802  
O 1.000410736703 -0.152905174671 -2.512167506463  
N 2.280211807048 0.729524899735 0.157964943775

ENERGY = -922.580398461890 hartree

• **6TS'5**

2S + 1 = 6

Rh -0.608178591191 1.125435937301 -2.004415626951  
Rh -0.451036283018 -2.247486516740 1.091038989815  
Rh 0.331901709215 -1.449248013162 -1.417315775580  
Rh 1.835335519129 -1.012663963021 0.689464010977  
Rh 1.489638765968 1.830987225610 -0.606246531623  
Rh -0.511806980907 0.253696962368 0.388805582123  
O -1.018269777964 -4.015669792620 -0.909512413861  
N -0.513816530248 -2.981078887960 -0.638893520956  
O 0.959031631541 0.117822462409 -2.373453062193  
N 2.347703880959 0.580855314480 0.234159951161

ENERGY = -922.568644072740 hartree

• **6INT'6**

2S + 1 = 6

Rh -0.890368541740 1.159866975607 -2.032253533511  
Rh -0.600346934626 -1.966036734902 1.120809862485  
Rh 0.195652860898 -1.269161059160 -1.347788835682  
Rh 1.775871499156 -0.768394050128 0.917395359644  
Rh 1.723748077206 1.100592916250 -0.934788439944

|    |                 |                 |                 |
|----|-----------------|-----------------|-----------------|
| Rh | -0.545743271712 | 0.531204011652  | 0.398808102872  |
| O  | -1.348109793990 | -3.695377275927 | -0.911686207142 |
| N  | -0.765776100141 | -2.720654862530 | -0.599007712937 |
| O  | 0.790166339867  | 0.216160755189  | -2.523506243128 |
| N  | 2.474007305968  | 0.831347096199  | 0.632023489086  |

ENERGY = -922.581565508610 hartree

• **6TS'6**

2S + 1 = 6

|    |                 |                 |                 |
|----|-----------------|-----------------|-----------------|
| Rh | -1.145387014235 | 0.916350312687  | -1.811369259516 |
| Rh | -0.840892967391 | -1.567581236825 | 0.887053497503  |
| Rh | 0.302015547533  | -1.363859069828 | -1.485799822549 |
| Rh | 1.681881603973  | -0.886709945041 | 0.960731810852  |
| Rh | 1.800817703480  | 1.016930918778  | -0.925674485529 |
| Rh | -0.382243712423 | 0.829493505222  | 0.558899542312  |
| O  | -0.390704036876 | -4.147199360492 | -0.953912653885 |
| N  | -0.161847759497 | -3.015412216422 | -1.005689131992 |
| O  | 0.634293793702  | 0.303665998986  | -2.436651355578 |
| N  | 2.632849589899  | 0.539954569394  | 0.542865593138  |

ENERGY = -922.562760929690 hartree

• **6INT'7**

2S + 1 = 6

|    |                 |                 |                 |
|----|-----------------|-----------------|-----------------|
| Rh | -1.350179242776 | 0.549168870832  | -1.370845771883 |
| Rh | -1.123238415299 | -1.173974233370 | 0.548454406148  |
| Rh | 0.471611664019  | -1.548001770923 | -1.555904452402 |
| Rh | 1.444725970519  | -0.913867455606 | 0.950087697542  |
| Rh | 1.848230946799  | 0.946200805229  | -0.990065770548 |
| Rh | -0.070517670252 | 1.204944556131  | 0.754930269667  |
| O  | 0.628324539925  | -4.442395146079 | -1.506983258688 |
| N  | 0.554324076507  | -3.298501899816 | -1.473462032527 |
| O  | 0.365620357603  | 0.312324250164  | -2.236347354501 |
| N  | 2.684870277254  | 0.226965523331  | 0.368616140445  |

ENERGY = -922.585562347330 hartree

• **4TS'7**

2S + 1 = 4

|    |                 |                |                 |
|----|-----------------|----------------|-----------------|
| Rh | -1.175748877513 | 1.166900667988 | -1.248623668831 |
|----|-----------------|----------------|-----------------|

|    |                 |                 |                 |
|----|-----------------|-----------------|-----------------|
| Rh | -1.255615217026 | -0.749632047016 | 0.459364387508  |
| Rh | 0.319991384368  | -1.610685853546 | -1.464794482621 |
| Rh | 1.330540674697  | -1.025388362163 | 0.965491060494  |
| Rh | 1.682323440135  | 0.992602791054  | -1.071312794543 |
| Rh | 0.155550680348  | 1.328722436115  | 0.978057435258  |
| O  | 0.189740122191  | -4.471779966928 | -1.041058387708 |
| N  | 0.272042930853  | -3.340204721448 | -1.204124336586 |
| O  | 0.168359067064  | 0.226655567268  | -2.223217001174 |
| N  | 2.400860956896  | 0.288673306549  | 0.386360014525  |

ENERGY = -922.579832752910 hartree

• **<sup>4</sup>INT'8**

2S + 1 = 4

|    |                 |                 |                 |
|----|-----------------|-----------------|-----------------|
| Rh | -1.074877280434 | 1.154643189358  | -1.249490908395 |
| Rh | -1.240784565425 | -0.767935158212 | 0.437380318886  |
| Rh | 0.273441935148  | -1.674778608742 | -1.507891360531 |
| Rh | 1.367172672533  | -0.961669045536 | 0.864037236177  |
| Rh | 1.681689873899  | 0.936089169495  | -1.109892692128 |
| Rh | 0.138360310164  | 1.372173536089  | 1.141323408688  |
| O  | 0.122030238292  | -4.528168571222 | -1.021413869798 |
| N  | 0.201785306825  | -3.395594150582 | -1.187352359830 |
| O  | 0.189393316263  | 0.129783648057  | -2.266622542898 |
| N  | 1.883075782239  | 0.831694138250  | 0.705164195639  |

ENERGY = -922.606872310030 hartree

• **<sup>4</sup>TS'8**

2S + 1 = 4

|    |                 |                 |                 |
|----|-----------------|-----------------|-----------------|
| Rh | 1.308681865667  | 0.785098596040  | -0.688523547360 |
| Rh | -0.010280393599 | -1.278615127092 | -0.110788857997 |
| Rh | -0.810435486771 | 0.563943580127  | 1.594515803029  |
| Rh | -2.446525172159 | -0.464053116468 | -0.306602646866 |
| Rh | -1.196241597743 | 1.754725421885  | -0.994301726453 |
| Rh | -0.435699374647 | -0.284558376893 | -2.523878912301 |
| O  | -1.541238194221 | -1.196183078344 | 3.781971735997  |
| N  | -1.296241332650 | -0.492837363959 | 2.907916417774  |
| O  | 0.195965890515  | 1.834518553142  | 0.461369770551  |
| N  | -2.144509205390 | -0.273303077438 | -2.041775918383 |

ENERGY = -922.578662926070 hartree

• **<sup>4</sup>INT'9**

2S + 1 = 4

|    |                 |                 |                 |
|----|-----------------|-----------------|-----------------|
| Rh | 1.338238657414  | 0.777544905873  | -0.773551145459 |
| Rh | 0.049723447423  | -1.245260721667 | -0.072654055980 |
| Rh | -0.817488095635 | 0.535416568111  | 1.622157498315  |
| Rh | -2.421043421674 | -0.416174362772 | -0.361108560013 |
| Rh | -1.201619608327 | 1.811730836695  | -0.957262416694 |
| Rh | -0.498499992008 | -0.286706118047 | -2.470308168053 |
| O  | -1.729315809156 | -1.231193438546 | 3.732181021713  |
| N  | -1.420886909399 | -0.519888695210 | 2.886495984416  |
| O  | 0.229719630210  | 1.719023480172  | 0.463874972773  |
| N  | -2.127956521147 | -0.799473220616 | -2.055055000607 |

ENERGY = -922.587162059530 hartree

• **<sup>4</sup>TS'9**

2S + 1 = 4

|    |                 |                 |                 |
|----|-----------------|-----------------|-----------------|
| Rh | 1.477830090644  | 0.673754786646  | -0.679109311820 |
| Rh | -0.150925537646 | -1.330270450318 | -0.200451537612 |
| Rh | -0.297916945093 | 0.433262567879  | 1.752782142585  |
| Rh | -2.321008595067 | 0.145304979111  | -0.028691080911 |
| Rh | -0.987044490515 | 2.070480056446  | -0.944895823018 |
| Rh | -0.452548185684 | 0.009164912195  | -2.449748993150 |
| O  | -1.288232474133 | -1.380583566312 | 3.781517335223  |
| N  | -0.878776801549 | -0.655013604543 | 2.994459767645  |
| O  | 0.301225906179  | 1.790897365987  | 0.468368476957  |
| N  | -1.936330701136 | -0.548930389089 | -1.641357147900 |

ENERGY = -922.579805893010 hartree

• **<sup>6</sup>INT1**

2S + 1 = 6

|    |                 |                 |                 |
|----|-----------------|-----------------|-----------------|
| Rh | 1.445083074928  | 0.934979686998  | -1.977064964808 |
| Rh | -0.446016029391 | -0.601955581034 | 1.009601384398  |
| Rh | -0.294846239037 | -1.799837930245 | -1.319081838559 |
| Rh | 2.128480565300  | -1.127113789934 | -0.573044385508 |
| Rh | 1.540563022669  | 1.630949650118  | 0.523304583729  |
| Rh | -0.787920063864 | 1.391859709372  | -0.602382558072 |

|   |                 |                 |                 |
|---|-----------------|-----------------|-----------------|
| O | -0.391285572956 | -4.587637335813 | -0.551717898652 |
| N | -0.362047061779 | -3.486825178611 | -0.869642700629 |
| O | -0.320866141163 | 0.051224444653  | -1.975488178963 |
| N | 1.326551958290  | -0.176353103504 | 0.779626045061  |

ENERGY = -922.617522729550 hartree

• **<sup>4</sup>INT2**

2S + 1 = 4

|    |                 |                 |                 |
|----|-----------------|-----------------|-----------------|
| Rh | -0.996102928039 | 0.232433641151  | 1.538895806013  |
| Rh | 0.967460372581  | -0.396112204756 | -1.963495936712 |
| Rh | 2.006320587565  | 0.383767542061  | 0.319569328972  |
| Rh | 0.471923969806  | -1.730390933856 | 0.723517582656  |
| Rh | -1.857969350657 | -0.331460499546 | -0.741354366664 |
| Rh | -0.432329905510 | 1.634633480139  | -1.284648789263 |
| O  | 4.581352297830  | -0.934859167240 | 0.372338870712  |
| N  | 3.577548829270  | -0.382030874334 | 0.343788709964  |
| O  | 0.312711514831  | 1.376126570733  | 0.483510283983  |
| N  | -0.257356747082 | -1.272733826595 | -0.905380094145 |
| O  | -2.971329673730 | -1.520589354502 | 2.980901603513  |
| C  | -2.223239518656 | -0.838801960612 | 2.437202522131  |

ENERGY = -1035.934702255830 hartree

• **<sup>4</sup>TS'10**

2S + 1 = 4

|    |                 |                 |                 |
|----|-----------------|-----------------|-----------------|
| Rh | 0.091248051075  | -0.766716156222 | 1.074847867508  |
| Rh | -0.322132163315 | 0.034495968152  | -2.415108962048 |
| Rh | 1.738092354990  | 0.841022214923  | -0.222438447968 |
| Rh | 1.150205299497  | -1.622622352589 | -1.200088024549 |
| Rh | -1.852348579178 | -1.160777711935 | -0.703293278824 |
| Rh | -1.379068304139 | 1.202922281046  | 0.233640027693  |
| O  | 4.152963543198  | 0.143302553615  | 1.217574251141  |
| N  | 3.214161340388  | 0.424502049553  | 0.624357523409  |
| O  | 0.124365280083  | 1.422843945468  | -1.144392370152 |
| N  | -0.462532913272 | -2.268012488304 | -0.799698030886 |
| O  | -3.537778741996 | 0.791520481802  | 2.292204239641  |
| C  | -2.728318305617 | 0.947090682573  | 1.491261617806  |

ENERGY = -1035.900016811760 hartree



• **<sup>4</sup>INT'10**

2S + 1 = 4

|    |                 |                 |                 |
|----|-----------------|-----------------|-----------------|
| Rh | 0.119689027014  | -0.671921198732 | 1.100803669473  |
| Rh | -0.332198162478 | 0.179122833124  | -2.290446372730 |
| Rh | 1.819784169937  | 0.803712869126  | -0.256260507236 |
| Rh | 1.054179369352  | -1.646197236151 | -1.169711650057 |
| Rh | -1.781511462427 | -1.263136803722 | -0.605130021338 |
| Rh | -1.433673810318 | 1.192193440250  | 0.168221348824  |
| O  | 4.297579864288  | -0.033242607373 | 0.984746452873  |
| N  | 3.330388918006  | 0.279963548277  | 0.455926835827  |
| O  | 0.187018002628  | 1.555531377022  | -1.015725075719 |
| N  | -0.543680805530 | -2.400362089075 | -1.124411982143 |
| O  | -3.866509073446 | 0.628897585852  | 1.859270070191  |
| C  | -2.950575497818 | 0.831285604556  | 1.195822845832  |

ENERGY = -1035.904362700520 hartree

• **<sup>4</sup>TS'11**

2S + 1 = 4

|    |                 |                 |                 |
|----|-----------------|-----------------|-----------------|
| Rh | 0.112001615380  | -0.570594144458 | 1.155001510863  |
| Rh | -0.225723625218 | -0.032054129165 | -2.327420210018 |
| Rh | 1.753858275556  | 0.779997697120  | -0.328767164324 |
| Rh | 1.125726356815  | -1.812454757541 | -0.926085143091 |
| Rh | -1.824866349624 | -1.217240825319 | -0.566251086633 |
| Rh | -1.410469090157 | 1.203453320328  | 0.209421038676  |
| O  | 4.147206190816  | 0.213096572618  | 1.214555936856  |
| N  | 3.232138514786  | 0.398239264640  | 0.545732742921  |
| O  | 0.136396665958  | 1.539894381913  | -1.017631786435 |
| N  | -0.552484902205 | -2.199149377615 | -1.298035252471 |
| O  | -3.549580108520 | 0.768501941480  | 2.294189403600  |
| C  | -2.748922617735 | 0.922784447893  | 1.483733916859  |

ENERGY = -1035.894970874530 hartree

• **<sup>4</sup>INT'11**

2S + 1 = 4

|    |                 |                 |                 |
|----|-----------------|-----------------|-----------------|
| Rh | 0.308044257349  | -0.858134134963 | 1.871371683470  |
| Rh | -0.198051408311 | -0.018408596355 | -1.735624061221 |
| Rh | 1.913294012430  | 0.518943504041  | 0.303461773168  |

|    |                 |                 |                 |
|----|-----------------|-----------------|-----------------|
| Rh | 1.126996106605  | -1.977147061374 | -0.382405400857 |
| Rh | -1.472391668782 | -1.561179361826 | 0.030835552061  |
| Rh | -1.173465934098 | 0.950976922040  | 0.795318559744  |
| O  | 4.450264640541  | -0.214773846403 | 1.503372429329  |
| N  | 3.441223541579  | 0.032147815561  | 1.017948410666  |
| O  | 0.367620263073  | 1.438962488578  | -0.390441108435 |
| N  | -0.377981150633 | -1.825277967812 | -1.488994371427 |
| O  | -3.567504956361 | 0.383485745070  | 2.544238046449  |
| C  | -2.651686601251 | 0.571890617151  | 1.874875895234  |

ENERGY = -1035.925648110000

• **<sup>4</sup>TS'12**

2S + 1 = 4

|    |                 |                 |                 |
|----|-----------------|-----------------|-----------------|
| Rh | 0.243308574729  | -0.660347077886 | 1.425899990993  |
| Rh | -0.348517517668 | 0.013720584043  | -1.053405614369 |
| Rh | 2.234353145330  | 0.471601149493  | 0.188382002977  |
| Rh | 1.336262028503  | -2.016403191408 | -0.529484779791 |
| Rh | -1.761956474448 | -1.778338779115 | 0.235879491499  |
| Rh | -1.293259218018 | 1.312678019948  | 0.865000856508  |
| O  | 4.453676965958  | -0.418933429435 | 1.838671572872  |
| N  | 3.582490247384  | -0.141284645273 | 1.148348027835  |
| O  | 0.913820229193  | 1.463324260180  | -0.740945036350 |
| N  | -0.409463740192 | -1.880474464492 | -1.072919541109 |
| O  | -3.621526939900 | -0.460761388035 | 1.431086929240  |
| C  | -2.608562362649 | -0.014356865980 | 1.016686887160  |

ENERGY = -1035.884061727730 hartree

• **<sup>4</sup>INT'12**

2S + 1 = 4

|    |                 |                 |                 |
|----|-----------------|-----------------|-----------------|
| Rh | 0.265048111760  | -0.523065401626 | 1.408055091198  |
| Rh | -0.338571716958 | 0.067234946512  | -1.040087117246 |
| Rh | 2.338345826901  | 0.404717358676  | 0.145398589571  |
| Rh | 1.295007925836  | -2.016596497052 | -0.553610587385 |
| Rh | -1.718027611838 | -1.809907306091 | 0.247973083813  |
| Rh | -1.444064306390 | 1.301965401583  | 0.915894837818  |
| O  | 4.364035833786  | -0.526287652915 | 2.015367248171  |
| N  | 3.575053053539  | -0.213385879977 | 1.245873533701  |

|   |                 |                 |                 |
|---|-----------------|-----------------|-----------------|
| O | 1.118848464408  | 1.307798214954  | -0.971200744237 |
| N | -0.430017622016 | -1.818503925377 | -1.120314423544 |
| O | -3.643734432770 | -0.569020212916 | 1.470134091484  |
| C | -2.633930274517 | -0.150010821906 | 1.011881157692  |

ENERGY = -1035.885050954910 hartree

• **<sup>4</sup>TS'13**

2S + 1 = 4

|    |                 |                 |                 |
|----|-----------------|-----------------|-----------------|
| Rh | 0.098842122737  | -0.232873570485 | 1.284246442722  |
| Rh | -0.170133550443 | 0.251914773703  | -1.314942956656 |
| Rh | 2.338489650251  | 0.380317951249  | 0.084396513356  |
| Rh | 1.167146189822  | -2.004646736321 | -0.419531906639 |
| Rh | -1.767996416366 | -1.703994084358 | 0.028793936023  |
| Rh | -1.902282965701 | 1.142492187530  | 0.352822232771  |
| O  | 4.203831451484  | -0.568355849892 | 2.111041153514  |
| N  | 3.471885733684  | -0.269602747675 | 1.279592116004  |
| O  | 1.325348592830  | 1.447411804624  | -1.084122053870 |
| N  | -0.404880948762 | -1.598312848988 | -1.282652336920 |
| O  | -3.148512558217 | -0.576829824595 | 2.335618583572  |
| C  | -2.491112363087 | -0.377096882757 | 1.377939063622  |

ENERGY = -1035.872976759370 hartree

• **<sup>4</sup>INT'13**

2S + 1 = 4

|    |                 |                 |                 |
|----|-----------------|-----------------|-----------------|
| Rh | -0.057540658836 | -0.077207884970 | 1.046954806378  |
| Rh | -0.289991553080 | 0.356308115244  | -1.387914820390 |
| Rh | 2.398619328324  | 0.366302523507  | 0.039191971327  |
| Rh | 1.120856632708  | -1.966835682376 | -0.374439604909 |
| Rh | -1.820587310255 | -1.644693803048 | -0.416113518044 |
| Rh | -2.371120928647 | 0.876459749383  | 0.220367749904  |
| O  | 3.823084383855  | -0.701313648635 | 2.338483011269  |
| N  | 3.293196806159  | -0.318756952992 | 1.397088312027  |
| O  | 1.412802440271  | 1.211344513830  | -1.328224004575 |
| N  | -0.272807901437 | -1.527015968047 | -1.483253243014 |
| O  | -2.556567656128 | -1.047779578755 | 2.421950332757  |
| C  | -1.969168798793 | -0.564722698498 | 1.512634652128  |

ENERGY = -1035.889184861820 hartree

• **<sup>4</sup>TS'14**

2S + 1 = 4

|    |                 |                 |                 |
|----|-----------------|-----------------|-----------------|
| Rh | -0.085938827984 | -0.209448500737 | 1.023636094755  |
| Rh | -0.198226336626 | 0.205343029477  | -1.421008600074 |
| Rh | 2.361595656606  | 0.442243971152  | 0.140716915376  |
| Rh | 1.182099249432  | -1.903260526551 | -0.556917623345 |
| Rh | -1.889285199523 | -1.609070646788 | -0.443259421891 |
| Rh | -2.392054318286 | 0.854412059498  | 0.242587502206  |
| O  | 3.855498302461  | -0.652107676568 | 2.384964825778  |
| N  | 3.275224426583  | -0.240747236771 | 1.487087705062  |
| O  | 1.386481943790  | 1.238272147016  | -1.266573512285 |
| N  | -0.398065420950 | -1.678107094267 | -1.511069191856 |
| O  | -2.413417716331 | -0.443824601466 | 2.853955598277  |
| C  | -1.963286820970 | -0.113280751960 | 1.819080495514  |

ENERGY = -1035.884288457150 hartree

• **<sup>4</sup>INT'14**

2S + 1 = 4

|    |                 |                 |                 |
|----|-----------------|-----------------|-----------------|
| Rh | -0.089772897311 | -0.117159241299 | 0.947848481190  |
| Rh | -0.140036197305 | 0.213869741010  | -1.515638202413 |
| Rh | 2.402151195200  | 0.406133657711  | 0.175622399715  |
| Rh | 1.165493383494  | -1.864840781931 | -0.594387720062 |
| Rh | -1.887331517606 | -1.603231779617 | -0.446164665499 |
| Rh | -2.506885631018 | 0.756670863713  | 0.339315353015  |
| O  | 3.606085637878  | -0.672359305385 | 2.595174508738  |
| N  | 3.165378426728  | -0.244508344118 | 1.628302511724  |
| O  | 1.525608468115  | 1.109277641429  | -1.345303543206 |
| N  | -0.438355220973 | -1.660022321283 | -1.537285582686 |
| O  | -2.124438162115 | -0.291140381823 | 3.056980748113  |
| C  | -1.908310892026 | -0.006933246100 | 1.938395653128  |

ENERGY = -1035.885005016780 hartree

• **<sup>4</sup>TS'15**

2S + 1 = 4

|    |                 |                 |                 |
|----|-----------------|-----------------|-----------------|
| Rh | -0.300631439200 | -1.258416954265 | 1.263395492016  |
| Rh | -0.356564351446 | 0.304364952433  | -1.514028495529 |
| Rh | 1.691711502843  | 0.329278905918  | 0.640566428474  |

|    |                 |                 |                 |
|----|-----------------|-----------------|-----------------|
| Rh | 1.233784459795  | -1.721140515454 | -0.981636558865 |
| Rh | -1.551490090357 | -2.205302919502 | -0.887411401472 |
| Rh | -2.337931435785 | 0.056869880197  | 0.129477426067  |
| O  | 3.625948075437  | -0.794948056656 | 2.509069058465  |
| N  | 2.853763755975  | -0.404319293975 | 1.755243199312  |
| O  | 0.658698355751  | 1.503127623997  | -0.380957870847 |
| N  | -0.275747299227 | -1.505566957761 | -2.039892167093 |
| O  | -1.242386435520 | 1.183545482219  | 2.566250172849  |
| C  | -1.278530160064 | 0.402932024878  | 1.693125504110  |

ENERGY = -1035.876865350430 hartree

• **<sup>4</sup>INT'15**

2S + 1 = 4

|    |                 |                 |                 |
|----|-----------------|-----------------|-----------------|
| Rh | -0.278966257213 | -1.249559015035 | 1.311885703663  |
| Rh | -0.301591823654 | 0.448773120561  | -1.539005660776 |
| Rh | 1.726923103169  | 0.304616563931  | 0.678845222482  |
| Rh | 1.092479499552  | -1.639386385104 | -1.023103194229 |
| Rh | -1.573210858474 | -2.340998728835 | -0.766318251755 |
| Rh | -2.249699231395 | -0.016206604527 | -0.012349592551 |
| O  | 3.677317660739  | -0.881247195150 | 2.485817469231  |
| N  | 2.895924821632  | -0.462698408924 | 1.756109908449  |
| O  | 0.713972873392  | 1.540634050145  | -0.306895463908 |
| N  | -0.510927245210 | -1.389110927368 | -1.957738341695 |
| O  | -1.381029053653 | 1.193255351892  | 2.480383709425  |
| C  | -1.319558227402 | 0.386963811814  | 1.633140796160  |

ENERGY = -1035.884504647940 hartree

• **<sup>4</sup>TS2** of CO oxidation

2S + 1 = 4

|    |                 |                 |                 |
|----|-----------------|-----------------|-----------------|
| Rh | -0.271574292960 | -1.274197034249 | 1.315886925452  |
| Rh | -0.326946427630 | 0.440838711144  | -1.530603374139 |
| Rh | 1.720400943997  | 0.320620744288  | 0.725663036076  |
| Rh | 1.149742353370  | -1.650723142792 | -0.971880306273 |
| Rh | -1.536276205293 | -2.357313892435 | -0.773701322429 |
| Rh | -2.257337171627 | -0.057311944987 | -0.005304423633 |
| O  | 3.982008422126  | -0.803676661713 | 2.152344901340  |
| N  | 3.096116415153  | -0.384415437352 | 1.557977009771  |

|   |                 |                 |                 |
|---|-----------------|-----------------|-----------------|
| O | 0.239413485712  | 1.417784975489  | 0.137870998355  |
| N | -0.428312144364 | -1.400292426875 | -1.908178533016 |
| O | -1.204789430258 | 1.330160505112  | 2.269339638394  |
| C | -0.983456513222 | 0.638507995373  | 1.335430997103  |

ENERGY = -1035.869687488160 hartree

• **<sup>4</sup>INT'16**

2S + 1 = 4

|    |                 |                 |                 |
|----|-----------------|-----------------|-----------------|
| Rh | -0.272025625508 | -1.269981962475 | 1.277890063840  |
| Rh | -0.340465388282 | 0.428189189092  | -1.544389333959 |
| Rh | 1.744886056574  | 0.344813791306  | 0.742830091385  |
| Rh | 1.182853905130  | -1.646217344946 | -0.940205383261 |
| Rh | -1.563923585472 | -2.362706742379 | -0.785269949604 |
| Rh | -2.259091818548 | -0.064851568960 | 0.023210298631  |
| O  | 3.966790443896  | -0.937409532794 | 2.061977084318  |
| N  | 3.101541375691  | -0.431615456658 | 1.509508931727  |
| O  | 0.090486880100  | 1.442111920277  | 0.319465212604  |
| N  | -0.406948100351 | -1.414785572217 | -1.840809240485 |
| O  | -1.285900302704 | 1.314770391188  | 2.174877422266  |
| C  | -0.864243820254 | 0.843729525658  | 1.137268730039  |

ENERGY = -1035.882421847530 hartree

• **<sup>2</sup>PRD**

2S + 1 = 2

|    |                 |                 |                 |
|----|-----------------|-----------------|-----------------|
| Rh | 1.815512956639  | -0.324341116969 | -0.804594103457 |
| Rh | -1.013174297486 | -0.703817520560 | -1.611531454471 |
| Rh | -1.579148736844 | 0.230893277967  | 0.743802679554  |
| Rh | 0.111938228200  | -1.665018207934 | 0.454729563707  |
| Rh | 0.903219643440  | 0.536456307053  | 1.415713276308  |
| Rh | -0.116476841513 | 1.985356892951  | -0.478223380459 |
| N  | 0.337789037990  | 0.541640149526  | -1.513685504543 |
| O  | -3.796173562842 | 1.341595754704  | 2.271130756437  |
| N  | -2.874435878575 | 1.029898592260  | 1.655443143921  |

ENERGY = -847.434268952160 hartree

(B) Reaction route via **<sup>6</sup>TS1b** of NO dissociation

• **<sup>8</sup>RCTb**

2S + 1 = 8

|    |                 |                 |                 |
|----|-----------------|-----------------|-----------------|
| Rh | 1.107546807897  | 1.420153585093  | -0.381079836876 |
| Rh | -1.059160586295 | 1.313542050920  | 1.078064952445  |
| Rh | 0.867027272564  | -1.429968983919 | -0.598458397686 |
| Rh | -1.208933828188 | -1.164331833385 | 0.918285829120  |
| Rh | -1.053417194396 | 0.247515537802  | -1.268355450420 |
| Rh | 1.120641690654  | -0.162853052148 | 1.605717346370  |
| O  | 0.823609762776  | 4.035470554641  | -1.613576356496 |
| N  | 1.052947737386  | 2.980571568252  | -1.222530346154 |
| O  | 0.452375058417  | -3.423687437050 | -2.681573202161 |
| N  | 0.679255094135  | -2.621349593439 | -1.895939782165 |
| O  | 3.671143546228  | -1.817614943225 | 1.532932412331  |
| C  | 2.708902050786  | -1.192486438827 | 1.553309662840  |

ENERGY = -1035.890454813480 hartree

• **'TS'16**

2S + 1 = 6

|    |                 |                 |                 |
|----|-----------------|-----------------|-----------------|
| Rh | -2.094086262171 | -0.725258531594 | 0.762796648721  |
| Rh | -1.058720164904 | 1.496133877779  | 0.059187766767  |
| Rh | 0.371190878212  | -0.286219331414 | 1.488741759703  |
| Rh | -0.119852692734 | -2.056968542613 | -0.343779318287 |
| Rh | -1.366414243091 | -0.350142003662 | -1.756957637658 |
| Rh | 1.050319486544  | 0.275810306904  | -0.928048255440 |
| O  | -0.793074341785 | 4.027981012095  | -1.345009169226 |
| N  | -0.827381890692 | 3.046301508276  | -0.747818480301 |
| O  | -1.112633943240 | -1.540390276640 | 3.682860873625  |
| N  | -0.685219466744 | -0.937201674093 | 2.794700443144  |
| O  | 3.157735755025  | -1.767652086373 | -1.590421174827 |
| C  | 2.362231065321  | -0.971457979412 | -1.352314747298 |

ENERGY = -1035.877197200100 hartree

• **'INT'17**

2S + 1 = 6

|    |                 |                 |                 |
|----|-----------------|-----------------|-----------------|
| Rh | -2.134802164235 | -0.721838539420 | 0.882023282678  |
| Rh | -1.001877073719 | 1.469079765469  | 0.067228514357  |
| Rh | 0.323506948420  | -0.279791379663 | 1.509551645656  |
| Rh | -0.065727154682 | -2.011706747226 | -0.323602675127 |

|    |                 |                 |                 |
|----|-----------------|-----------------|-----------------|
| Rh | -1.335404299228 | -0.392211807384 | -1.737630034215 |
| Rh | 1.089537282284  | 0.277872781065  | -0.997328446935 |
| O  | -0.843038428189 | 3.960107936370  | -1.425379530859 |
| N  | -0.910277388520 | 2.978252998762  | -0.833370023661 |
| O  | -1.384775855075 | -1.598239404992 | 3.494090303592  |
| N  | -1.123624861213 | -1.003286208462 | 2.512690473642  |
| O  | 3.128323309565  | -1.720477587152 | -1.939123505958 |
| C  | 2.363040319338  | -0.937070371984 | -1.587480786662 |

ENERGY = -1035.890556396720 hartree

• **'TS'17**

2S + 1 = 6

|    |                 |                 |                 |
|----|-----------------|-----------------|-----------------|
| Rh | -2.106153424243 | -1.107249652927 | 0.886875064636  |
| Rh | -1.595470479951 | 1.431291831179  | 0.018645681605  |
| Rh | 0.132277821804  | 0.096745858640  | 1.462860004308  |
| Rh | 0.239254856491  | -1.827417287127 | -0.220732894996 |
| Rh | -1.345950721968 | -0.503460091499 | -1.671316199832 |
| Rh | 0.905556195058  | 0.655968943603  | -1.023920320343 |
| O  | 0.096708175341  | 2.946756904984  | -1.465766522466 |
| N  | -0.948831526594 | 2.781153500207  | -0.936034651343 |
| O  | -1.265116665717 | -1.442176081873 | 3.543725680296  |
| N  | -1.101575307255 | -0.879074159721 | 2.522521263591  |
| O  | 3.081521238774  | -1.349541169855 | -1.478610225016 |
| C  | 2.212542784497  | -0.611985290922 | -1.281511672775 |

ENERGY = -1035.874044540770 hartree

• **'INT'18**

2S + 1 = 6

|    |                 |                 |                 |
|----|-----------------|-----------------|-----------------|
| Rh | -2.077652090584 | -1.153637612525 | 0.881004458765  |
| Rh | -1.747250721904 | 1.439856169665  | 0.020065683058  |
| Rh | 0.069645291305  | 0.193560465329  | 1.416035456680  |
| Rh | 0.294019005679  | -1.810803784852 | -0.204852165658 |
| Rh | -1.309033167462 | -0.438572767860 | -1.636605324484 |
| Rh | 1.000503996961  | 0.664825239061  | -1.062727314838 |
| O  | 0.239446027426  | 2.679270175103  | -1.272058019574 |
| N  | -0.884102034051 | 2.749482569277  | -0.834921966330 |
| O  | -1.067740162412 | -1.537133576845 | 3.498539631986  |



|   |                 |                 |                 |
|---|-----------------|-----------------|-----------------|
| N | -1.037988299685 | -0.904181299885 | 2.508188169332  |
| O | 2.876615383079  | -1.636052303689 | -1.441548151702 |
| C | 1.986462450810  | -0.930399213876 | -1.173629044151 |

ENERGY = -1035.879498175190 hartree

• **6TS'18**

2S + 1 = 6

|    |                 |                 |                 |
|----|-----------------|-----------------|-----------------|
| Rh | -2.023778184546 | -1.308086279870 | 0.755665139260  |
| Rh | -2.066434561850 | 1.213001578019  | -0.155644262605 |
| Rh | -0.152397349581 | 0.575699095317  | 1.594705776759  |
| Rh | 0.509224508546  | -1.435302559374 | 0.121115371432  |
| Rh | -0.978708092903 | -0.487380152443 | -1.701296051069 |
| Rh | 1.226549851743  | 0.769922713527  | -1.121944485864 |
| O  | 0.306779422874  | 2.498245182363  | -0.251965440392 |
| N  | -0.914375986829 | 2.548081427360  | -0.350868734127 |
| O  | -1.552643121069 | -0.984735814695 | 3.499267561805  |
| N  | -1.343261700411 | -0.618576541096 | 2.394688647986  |
| O  | 2.715616271129  | -1.458539191717 | -2.446803605561 |
| C  | 2.114235775423  | -0.633463259967 | -1.911766318574 |

ENERGY = -1035.870266537920 hartree

• **6INT'19**

2S + 1 = 6

|    |                 |                 |                 |
|----|-----------------|-----------------|-----------------|
| Rh | -1.998525166773 | -1.270826285739 | 0.817740156019  |
| Rh | -2.044028062813 | 1.194323646832  | -0.402814087983 |
| Rh | -0.380817937431 | 0.756049684046  | 1.620437667852  |
| Rh | 0.600577040464  | -1.328035616632 | 0.382478582518  |
| Rh | -0.866722308958 | -0.695359940529 | -1.604531584177 |
| Rh | 1.263190854910  | 0.706567952937  | -1.075968177956 |
| O  | 0.351082592955  | 2.220663043974  | 0.175984404980  |
| N  | -0.721216083516 | 2.397823575423  | -0.487181371579 |
| O  | -1.681353654973 | -0.964331238376 | 3.554611931223  |
| N  | -1.406535245361 | -0.563043032281 | 2.478822871445  |
| O  | 2.634014608156  | -1.266343595083 | -2.853890140411 |
| C  | 2.091140195857  | -0.508621997136 | -2.180536652895 |

ENERGY = -1035.874149094430 hartree

• **6TS'19**

2S + 1 = 6

|    |                 |                 |                 |
|----|-----------------|-----------------|-----------------|
| Rh | -2.007645769837 | -1.321145075643 | 0.963329832698  |
| Rh | -2.211425035661 | 1.112424457896  | -0.224889777431 |
| Rh | -0.426506105283 | 0.777498156753  | 1.584981671018  |
| Rh | 0.488100595035  | -1.272392839571 | 0.260598245826  |
| Rh | -0.814583677560 | -0.494205598777 | -1.717137808913 |
| Rh | 1.481908113522  | 0.647420056757  | -1.114743219468 |
| O  | 0.268765906746  | 2.061854234465  | -0.032335729610 |
| N  | -0.754648886399 | 2.020982270660  | -0.799171376003 |
| O  | -1.701811788757 | -0.800174714532 | 3.669827032276  |
| N  | -1.446342146000 | -0.494513404182 | 2.557867771138  |
| O  | 2.965599900852  | -1.409621573003 | -2.697329215075 |
| C  | 2.389469520022  | -0.621363238597 | -2.090246101709 |

ENERGY = -1035.865347000060 hartree

• **<sup>6</sup>INT'20**

2S + 1 = 6

|    |                 |                 |                 |
|----|-----------------|-----------------|-----------------|
| Rh | -2.140140758086 | -1.539990135926 | 1.148458052204  |
| Rh | -2.206370285772 | 0.592868657899  | -0.455156023252 |
| Rh | -0.382392171766 | 0.733457900198  | 1.347974762313  |
| Rh | -0.213126040469 | -1.172557918986 | -0.493192350384 |
| Rh | -0.395435903030 | 0.563812458466  | -2.414815681693 |
| Rh | 1.596076255183  | 0.691342445508  | -0.821694949522 |
| O  | 0.132195583385  | 2.110453036839  | -0.247575841408 |
| N  | -0.858261454296 | 1.841117527709  | -1.079866516507 |
| O  | -1.033064690368 | -0.934807360341 | 3.567251122338  |
| N  | -1.128688856816 | -0.617850297122 | 2.426578529936  |
| O  | 3.348151013216  | -1.508061361962 | -1.890617603067 |
| C  | 2.693246993569  | -0.660593107520 | -1.476819407925 |

ENERGY = -1035.898176773460 hartree

• **<sup>6</sup>TS1b** of NO dissociation

2S + 1 = 6

|    |                 |                 |                 |
|----|-----------------|-----------------|-----------------|
| Rh | -2.094531446156 | -1.463342912941 | 1.284352621590  |
| Rh | -2.198808303613 | 0.610053197827  | -0.580531798162 |
| Rh | -0.486569484051 | 0.698992539960  | 1.319888497007  |
| Rh | -0.279298572072 | -1.217888942204 | -0.501063930093 |

|    |                 |                 |                 |
|----|-----------------|-----------------|-----------------|
| Rh | -0.303142184837 | 0.617311700779  | -2.460342476360 |
| Rh | 1.541660651213  | 0.648172408078  | -0.752272413809 |
| O  | 0.358907642957  | 1.936369489481  | 0.135393681206  |
| N  | -1.119186628779 | 1.822467577181  | -1.396077783576 |
| O  | -0.764994918032 | -1.082293219117 | 3.661587121320  |
| N  | -1.006069775196 | -0.653709574416 | 2.590668346406  |
| O  | 3.410396121230  | -1.329967759590 | -2.124735325380 |
| C  | 2.703578111347  | -0.586164500056 | -1.613112209132 |

ENERGY = -1035.868268797140 hartree

• **<sup>4</sup>INT'21**

2S + 1 = 4

|    |                 |                 |                 |
|----|-----------------|-----------------|-----------------|
| Rh | -2.269124341219 | -0.975108090909 | 0.781318278459  |
| Rh | -2.334144414435 | 1.291240124423  | -0.448463634187 |
| Rh | -0.476046046190 | 0.806210082647  | 1.293571985769  |
| Rh | 0.239754215525  | -1.262932378327 | 0.052741795152  |
| Rh | -0.141425092833 | -0.120688546522 | -2.245835572329 |
| Rh | 1.769765232568  | 0.643223311071  | -0.751342428627 |
| O  | 0.876732002042  | 1.797409954695  | 0.546186632532  |
| N  | -1.603125467668 | 0.758380863177  | -1.948868173428 |
| O  | -1.992358699963 | -0.445963641007 | 3.543343900665  |
| N  | -1.671195507586 | -0.199573946383 | 2.440883320445  |
| O  | 3.466789858416  | -1.193892860202 | -2.468312423635 |
| C  | 2.793389548908  | -0.503724061804 | -1.843133375741 |

ENERGY = -1035.888050837270 hartree

• **<sup>4</sup>TS'20**

2S + 1 = 4

|    |                 |                 |                 |
|----|-----------------|-----------------|-----------------|
| Rh | -2.246568233180 | -0.955125006373 | 0.574377562903  |
| Rh | -2.219750918623 | 1.465608555637  | -0.477441975952 |
| Rh | -0.458230819731 | 0.769849043976  | 1.315178711967  |
| Rh | 0.378856256622  | -1.313420629205 | 0.169154902085  |
| Rh | -0.251800970389 | -0.255858340950 | -2.120362826573 |
| Rh | 1.690881926821  | 0.700101414820  | -0.755173977733 |
| O  | 1.002120905646  | 1.740653233849  | 0.744579250408  |
| N  | -1.863341734862 | 0.128077290805  | -1.581618987612 |
| O  | -2.213418777655 | -0.436827826827 | 3.389717532044  |

|   |                 |                 |                 |
|---|-----------------|-----------------|-----------------|
| N | -1.784694238657 | -0.218461656283 | 2.319245835786  |
| O | 3.302861223783  | -0.934914106360 | -2.736535826391 |
| C | 2.638919290971  | -0.325087280660 | -2.022285718246 |

ENERGY = -1035.877225523870 hartree

• **<sup>4</sup>INT'23**

2S + 1 = 4

|    |                 |                 |                 |
|----|-----------------|-----------------|-----------------|
| Rh | -2.080962621049 | -1.058144322358 | 0.401405396592  |
| Rh | -1.404857172748 | 1.618066796714  | -0.676077409659 |
| Rh | -0.527232110675 | 0.654703313598  | 1.630079936593  |
| Rh | 0.495615736449  | -1.195184089748 | 0.259472826846  |
| Rh | -0.669599821461 | -0.480416144269 | -2.009553127290 |
| Rh | 1.361824969804  | 0.862408969830  | -0.880716259476 |
| O  | 0.337954130761  | 1.967791581647  | 0.406931966322  |
| N  | -2.235358116626 | 0.061654401791  | -1.184454467154 |
| O  | -2.756173272890 | -0.549356384735 | 3.144539682626  |
| N  | -1.921625450249 | -0.470476822331 | 2.318511262632  |
| O  | 3.139394670561  | -0.754438926998 | -2.730325543085 |
| C  | 2.441392654160  | -0.158502302328 | -2.039226217283 |

ENERGY = -1035.911691756780 hartree

• **<sup>4</sup>TS'21**

2S + 1 = 4

|    |                 |                 |                 |
|----|-----------------|-----------------|-----------------|
| Rh | -2.164274636905 | -1.012529338707 | 0.233012438425  |
| Rh | -1.477381730588 | 1.586487934289  | -0.705333773342 |
| Rh | -0.577225520415 | 0.656796866320  | 1.641282120747  |
| Rh | 0.429876296550  | -1.206989504713 | 0.227088519469  |
| Rh | -0.608920628672 | -0.435632137812 | -2.098337795416 |
| Rh | 1.353243115254  | 0.839798804900  | -0.871981892507 |
| O  | 0.333721170325  | 1.888017252324  | 0.469500489336  |
| N  | -2.227606268358 | 0.026570076180  | -1.335681965653 |
| O  | -2.675938847432 | -0.600969433309 | 3.264613128728  |
| N  | -1.822262371499 | -0.332935553130 | 2.526018794225  |
| O  | 3.167490430812  | -0.754043861675 | -2.698810837847 |
| C  | 2.452309615459  | -0.160854699605 | -2.022146140774 |

ENERGY = -1035.905377792080 hartree

• **<sup>4</sup>INT'23**

2S + 1 = 4

|    |                 |                 |                 |
|----|-----------------|-----------------|-----------------|
| Rh | -2.424697127236 | -0.501768649741 | -0.366014184256 |
| Rh | -1.351146905069 | 1.828929768542  | -1.006080819722 |
| Rh | -0.786046634860 | 0.533039641599  | 1.572012209630  |
| Rh | 0.081983447839  | -1.295798767691 | -0.000244679456 |
| Rh | -0.459915092795 | -0.220911580366 | -2.390092456325 |
| Rh | 1.387091454033  | 0.691350407985  | -0.769670267877 |
| O  | 0.156363928672  | 1.745615835575  | 0.418999801608  |
| N  | -2.143177096629 | 0.446382746458  | -1.925598175803 |
| O  | -1.704450125130 | -1.170859825531 | 3.738418019109  |
| N  | -1.370859623305 | -0.507264274427 | 2.865169945353  |
| O  | 3.326270516082  | -0.960604014257 | -2.393998094714 |
| C  | 2.571644485073  | -0.338719361949 | -1.791079840678 |

ENERGY = -1035.923580929800 hartree

• **<sup>4</sup>TS'22**

2S + 1 = 4

|    |                 |                 |                 |
|----|-----------------|-----------------|-----------------|
| Rh | -2.478141367373 | -0.487251919012 | -0.299280784633 |
| Rh | -1.402429668981 | 1.824707893631  | -0.974716526140 |
| Rh | -0.788315578012 | 0.559873010868  | 1.576479407951  |
| Rh | 0.002922952924  | -1.293374728517 | -0.064043336063 |
| Rh | -0.368112834643 | -0.125958795839 | -2.438299199913 |
| Rh | 1.429961384955  | 0.669362801477  | -0.774624874136 |
| O  | 0.167475775518  | 1.710235076974  | 0.376827607489  |
| N  | -2.075750912931 | -0.262719955787 | -2.001009140597 |
| O  | -1.546516373659 | -1.171706261400 | 3.780770265655  |
| N  | -1.317616378849 | -0.474431111103 | 2.897798698722  |
| O  | 3.416161734310  | -1.049199697099 | -2.262794786011 |
| C  | 2.648766008529  | -0.388308727524 | -1.719331105977 |

ENERGY = -1035.894957210200 hartree

• **<sup>4</sup>INT'24**

2S + 1 = 4

|    |                 |                 |                 |
|----|-----------------|-----------------|-----------------|
| Rh | -2.336085511398 | 0.001297457670  | -0.127780691473 |
| Rh | -0.458057733726 | 0.002717212078  | -2.356998245537 |
| Rh | -0.450102692986 | 0.469284665859  | 1.781422885754  |
| Rh | -0.043849875412 | -1.303915668723 | -0.118601483269 |

|    |                 |                 |                 |
|----|-----------------|-----------------|-----------------|
| Rh | -0.942027949852 | 2.047971105391  | -0.748519699872 |
| Rh | 1.558882136751  | 0.612828354969  | -0.840486914564 |
| O  | 0.469435304490  | 1.657203667252  | 0.530531601921  |
| N  | -2.120554609797 | -0.283347511708 | -1.859795186443 |
| O  | -1.567127269223 | -1.270193197237 | 3.805024509315  |
| N  | -1.166948621008 | -0.553588579674 | 3.006398014680  |
| O  | 3.139365624760  | -0.871390201129 | -2.938114028431 |
| C  | 2.523859026647  | -0.299356726403 | -2.154091074986 |

ENERGY = -1035.904362007630 hartree

• **<sup>4</sup>TS'23**

2S + 1 = 4

|    |                 |                 |                 |
|----|-----------------|-----------------|-----------------|
| Rh | -2.384016180683 | 0.035151093527  | -0.040916585185 |
| Rh | -0.399161857108 | 0.143521596312  | -2.396426684457 |
| Rh | -0.376848539447 | 0.467569042178  | 1.731367919758  |
| Rh | -0.111256101750 | -1.325821844010 | -0.192855231423 |
| Rh | -1.108518430333 | 2.072718581474  | -0.821781030661 |
| Rh | 1.578230759916  | 0.556393629752  | -0.782884554905 |
| O  | 0.344266534736  | 1.690097819970  | 0.400747541499  |
| N  | -1.894123860376 | -0.493838163955 | -1.672596173315 |
| O  | -1.251687452190 | -1.336959630183 | 3.822501403231  |
| N  | -0.930612607605 | -0.600765467157 | 3.005717222966  |
| O  | 3.318853482648  | -1.165807700124 | -2.535160648292 |
| C  | 2.652827227252  | -0.499805447561 | -1.876990192789 |

ENERGY = -1035.900051176540 hartree
